# Supplementary material for: Cu(i)-catalyzed tandem benzyldiazoester coupling with terminal alkyne–allene formation–Michael reaction: Application to the syntheses of oxa and azacycles
Source: Royal Society of Chemistry journal article supplement (doi:10.1039/c1ob06128c), 2011-01-01
Supplement: c1ob06128c.pdf [file c1ob06128c.pdf]

# **Cu(I)-Catalyzed Tandem Benzyldiazoester coupling with Terminal Alkyne-Allene formation-Michael reaction: Application to the synthesis of Oxa and Azacycles**

Gullapalli Kumaraswamy\* Neerasa Jayaprakash and Guniganti Balakishan  
Organic Division III,  
Indian Institute of Chemical Technology, Hyderabad-500 607, India.  
Tel: + 91-40-27193154. Fax: + 91-40-27193275.

## **Supporting Information**

### **Table of Contents**

|                                                                             |        |
|-----------------------------------------------------------------------------|--------|
| 1. Copies of $^1\text{H}$ and $^{13}\text{C}$ NMR spectra for all compounds | S2-S24 |
| 2. HPLC data for compounds <b>3b</b> and <b>3f</b>                          | S25-28 |

$^1\text{H}$  NMR of **3b** in  $\text{CDCl}_3$

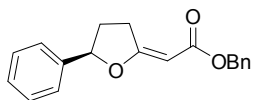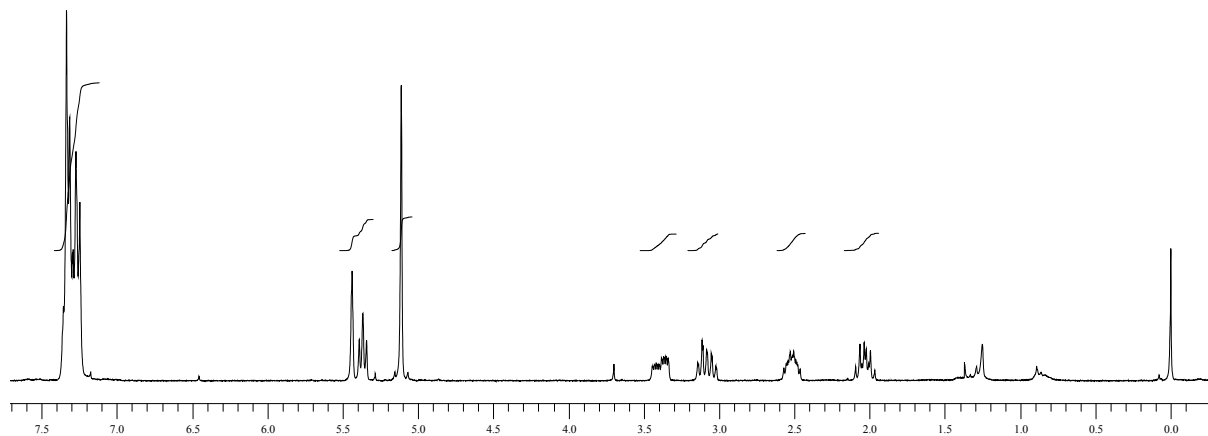

$^{13}\text{C}$  NMR of **3b** in  $\text{CDCl}_3$

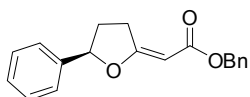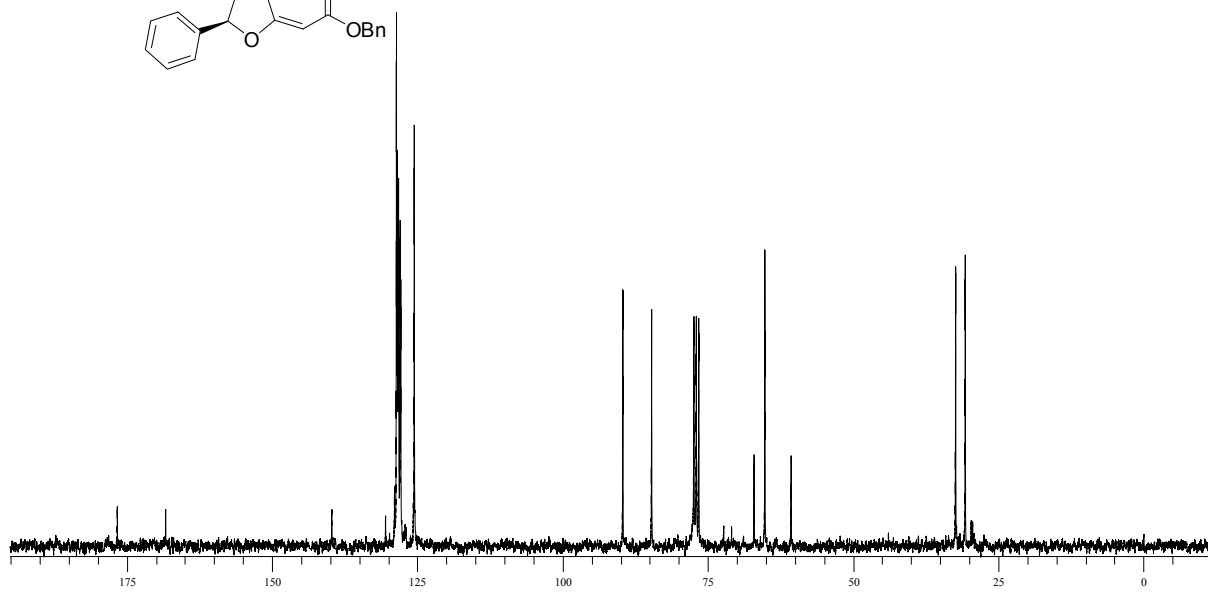

$^1\text{H}$  NMR of **3c** in  $\text{CDCl}_3$

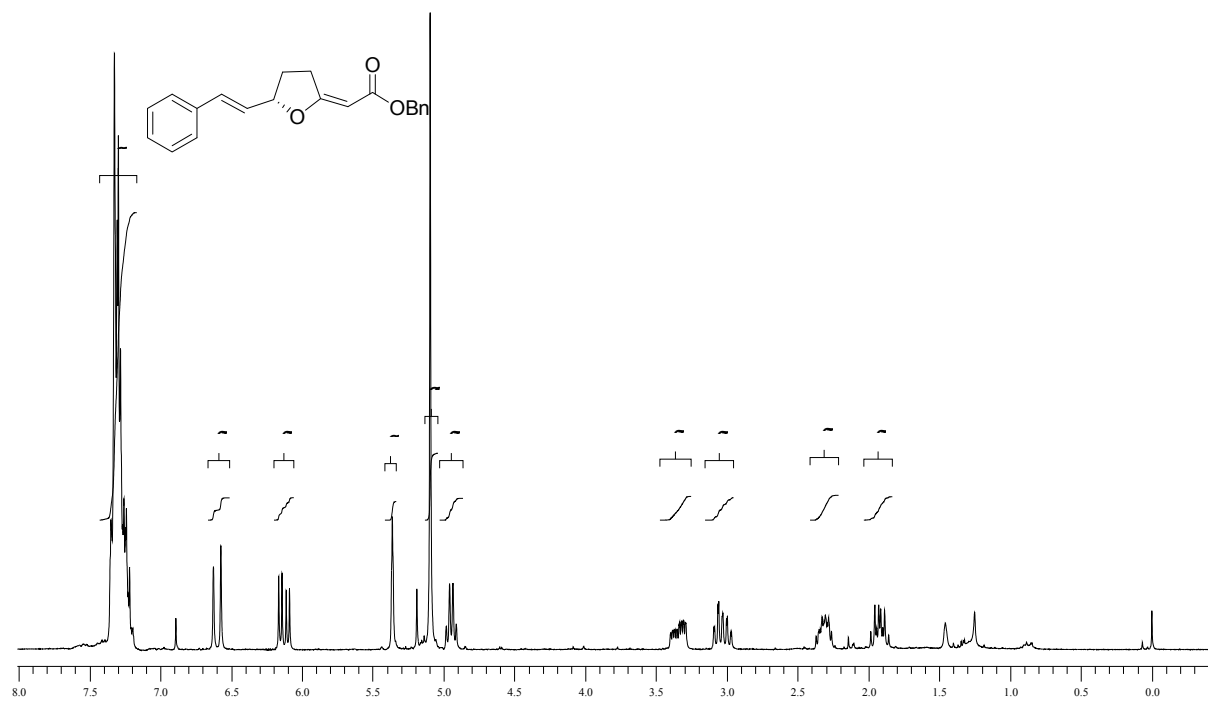

$^{13}\text{C}$  NMR of **3c** in  $\text{CDCl}_3$

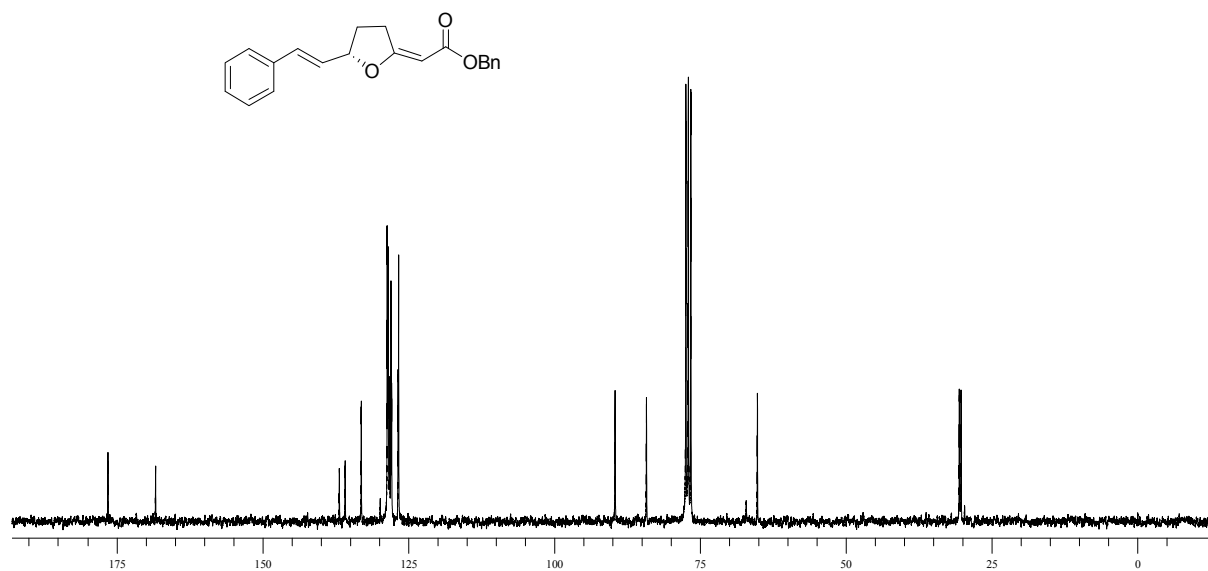

$^1\text{H}$  NMR of **3d** in  $\text{CDCl}_3$

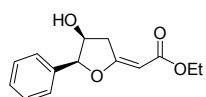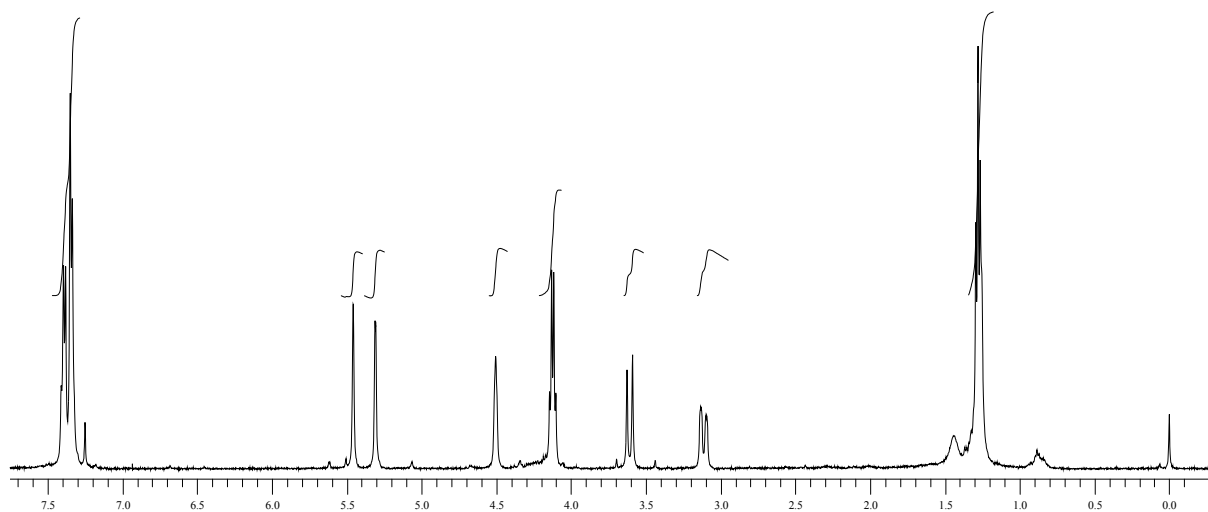

$^{13}\text{C}$  NMR of **3d** in  $\text{CDCl}_3$

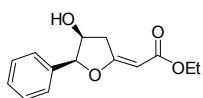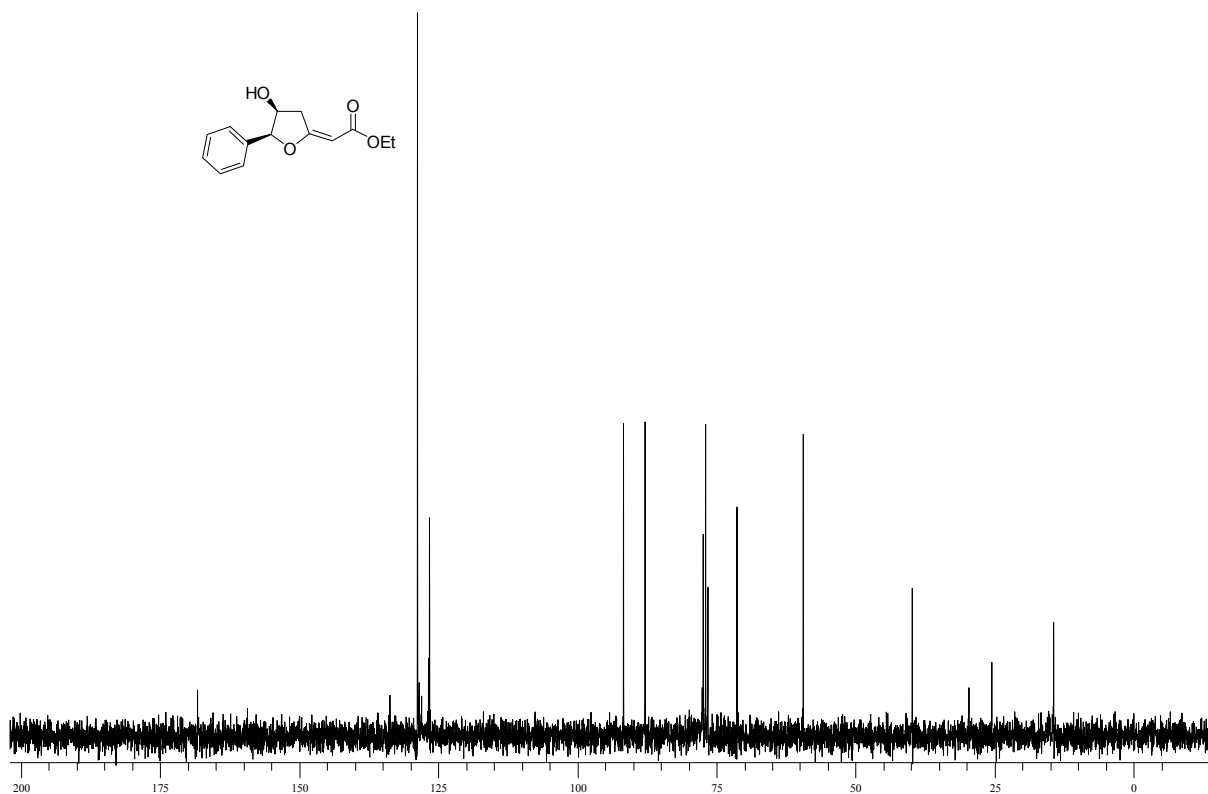

$^1\text{H}$  NMR of **3e** in  $\text{CDCl}_3$

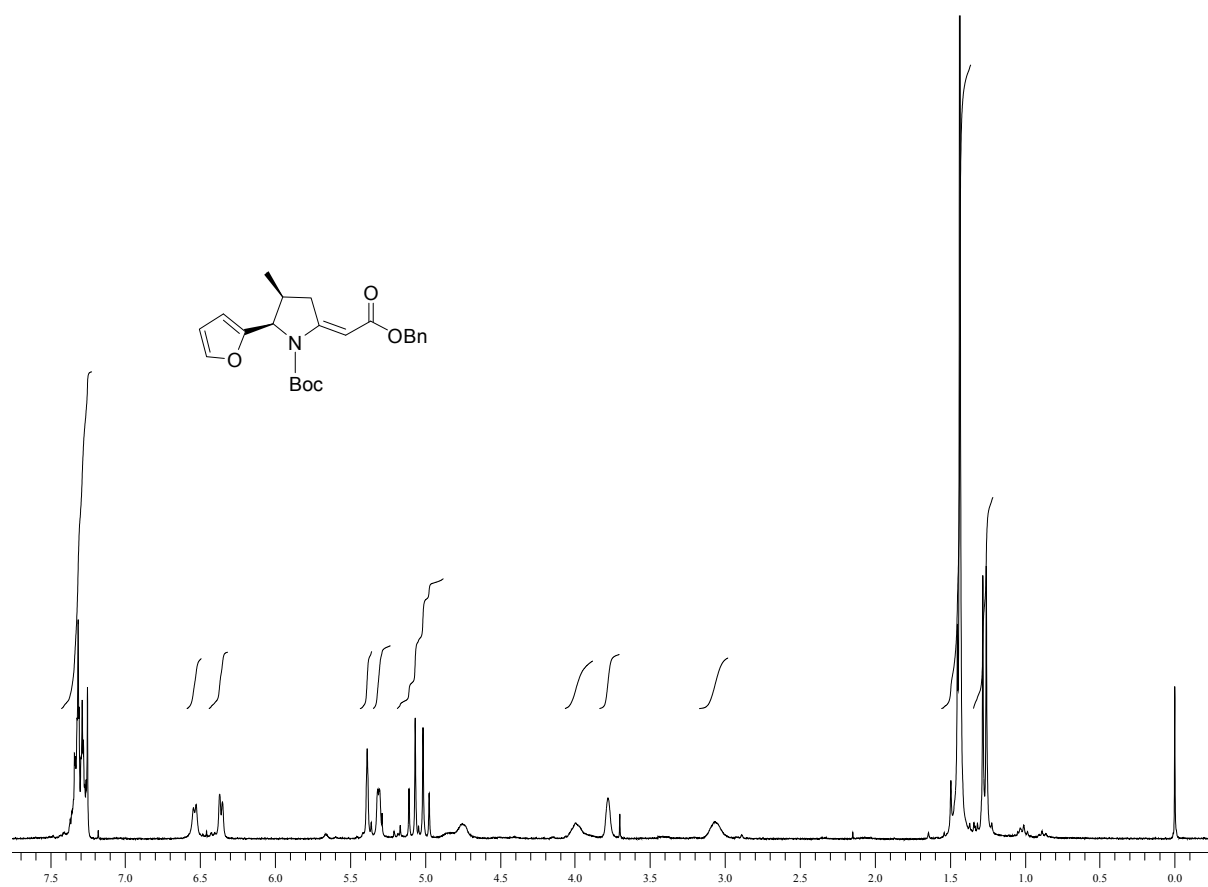

$^{13}\text{C}$  NMR of **3e** in  $\text{CDCl}_3$

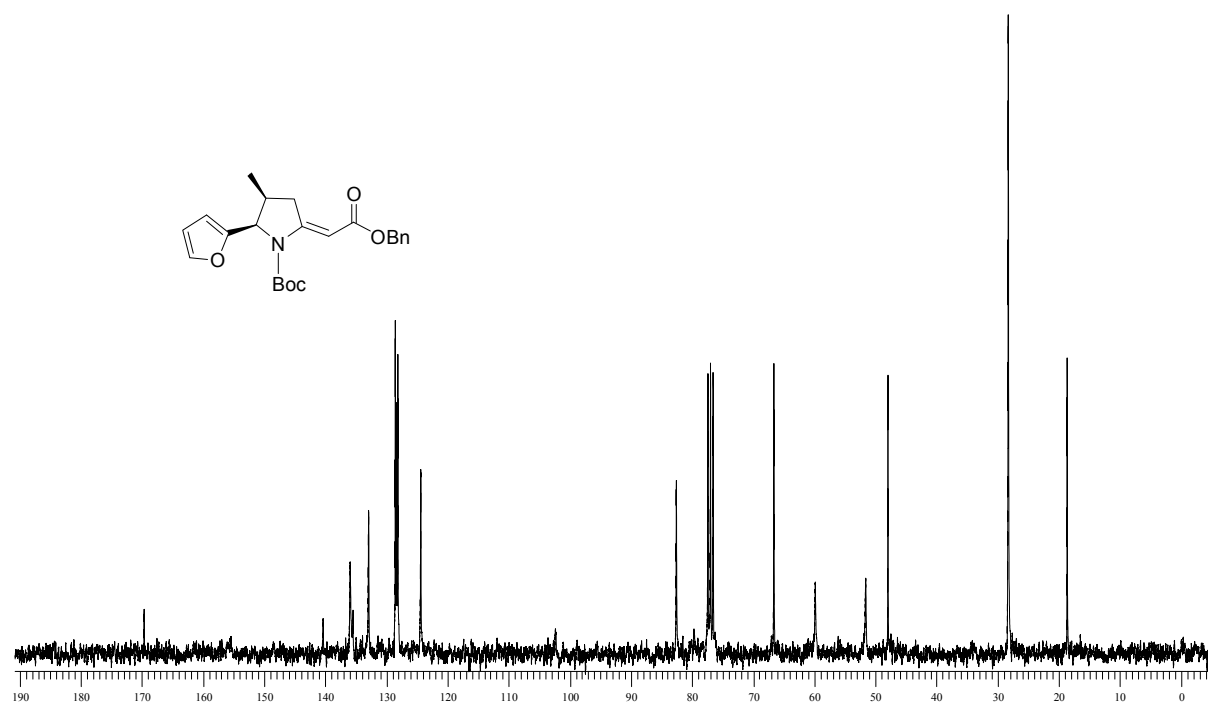

$^1\text{H}$  NMR of **3f** in  $\text{CDCl}_3$

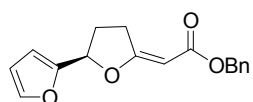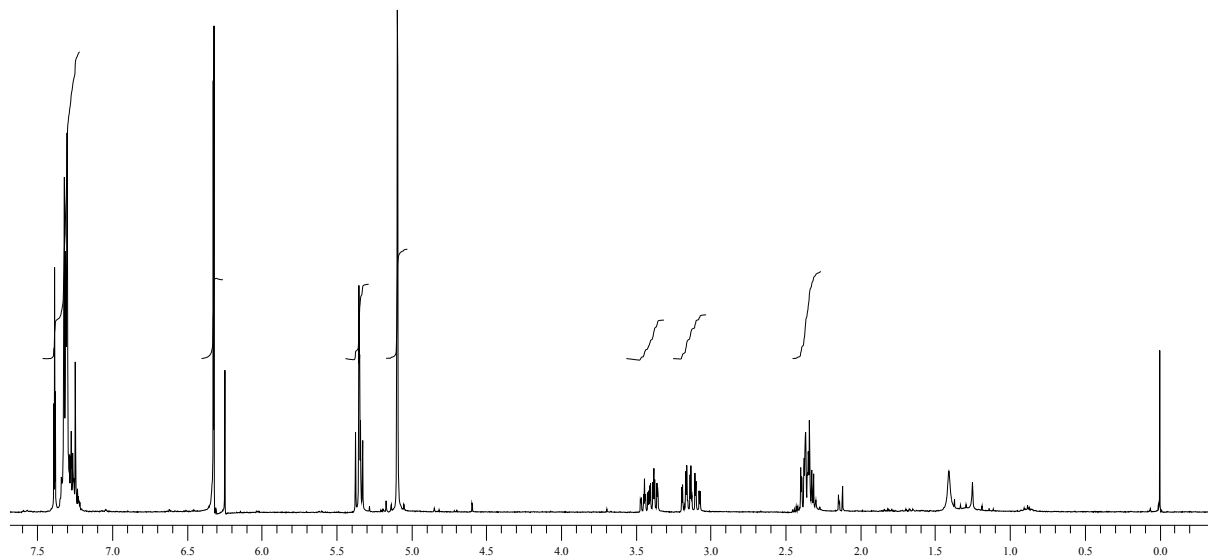

$^{13}\text{C}$  NMR of **3f** in  $\text{CDCl}_3$

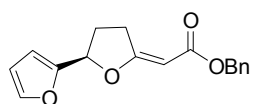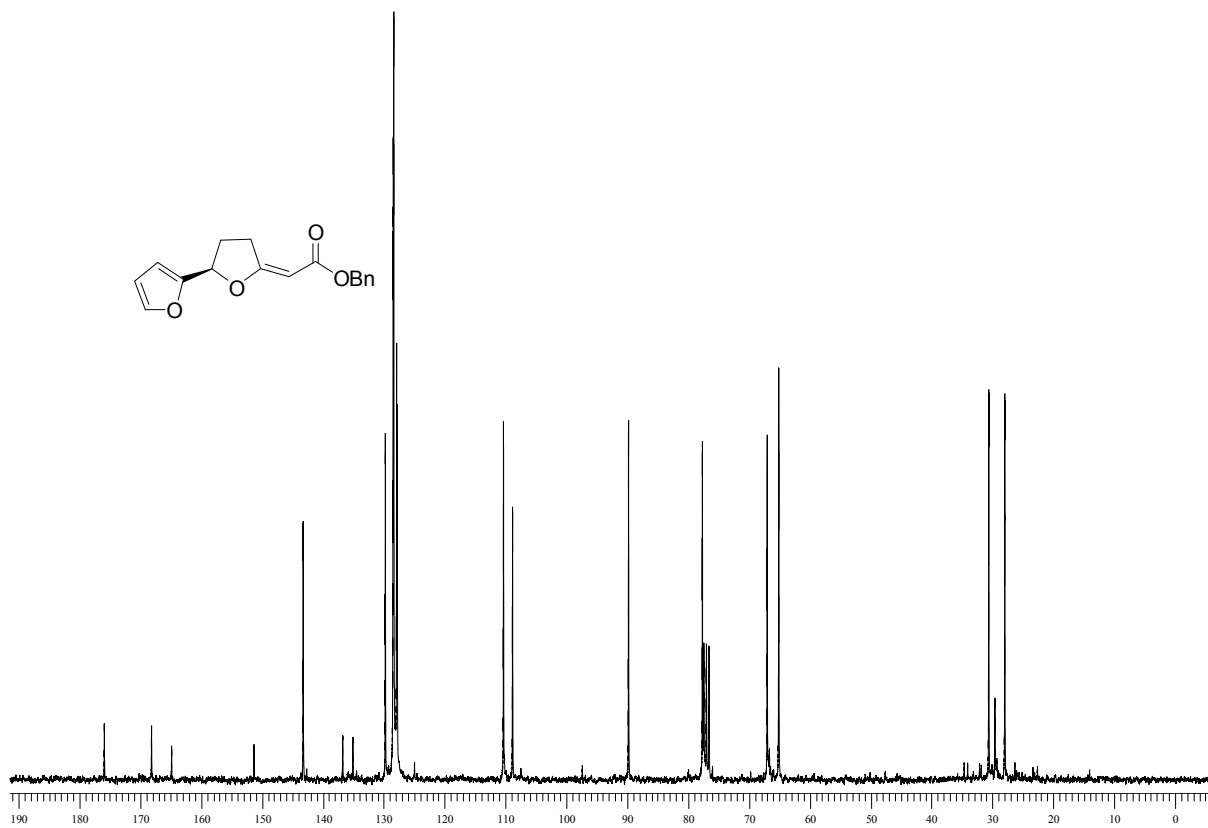

$^1\text{H}$  NMR of **3g** in  $\text{CDCl}_3$

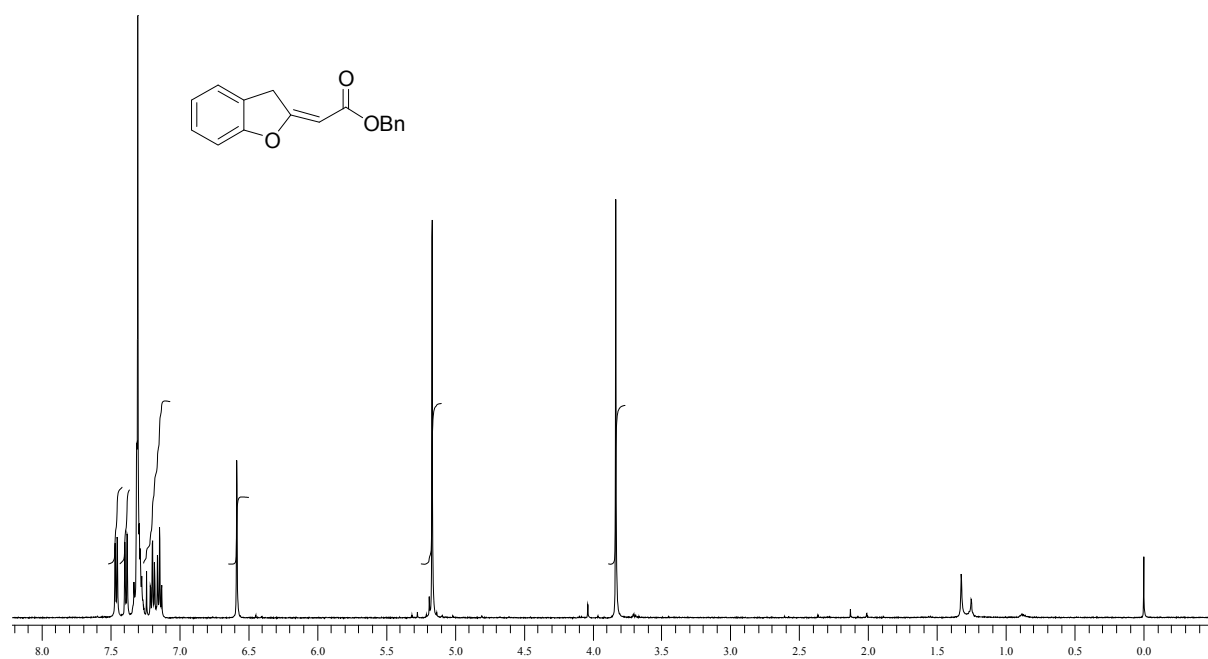

$^{13}\text{C}$  NMR of **3g** in  $\text{CDCl}_3$

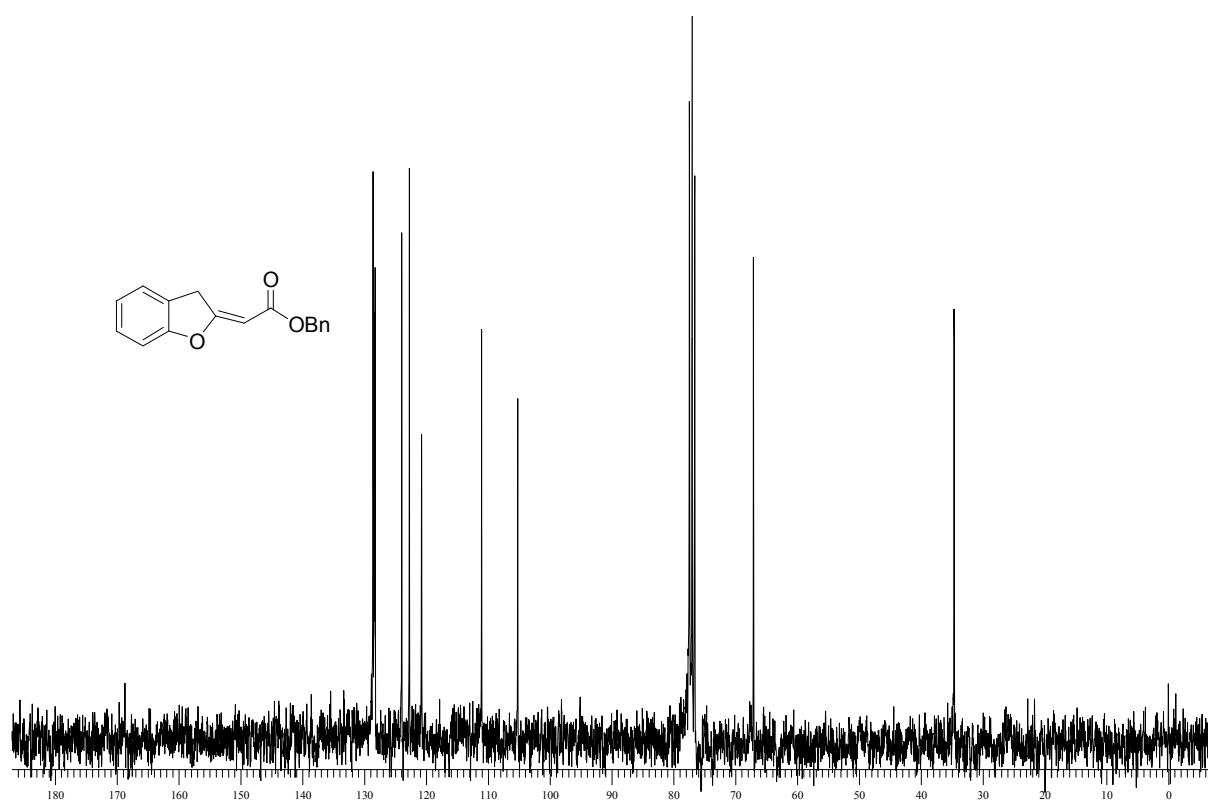

$^1\text{H}$  NMR of **3h** in  $\text{CDCl}_3$

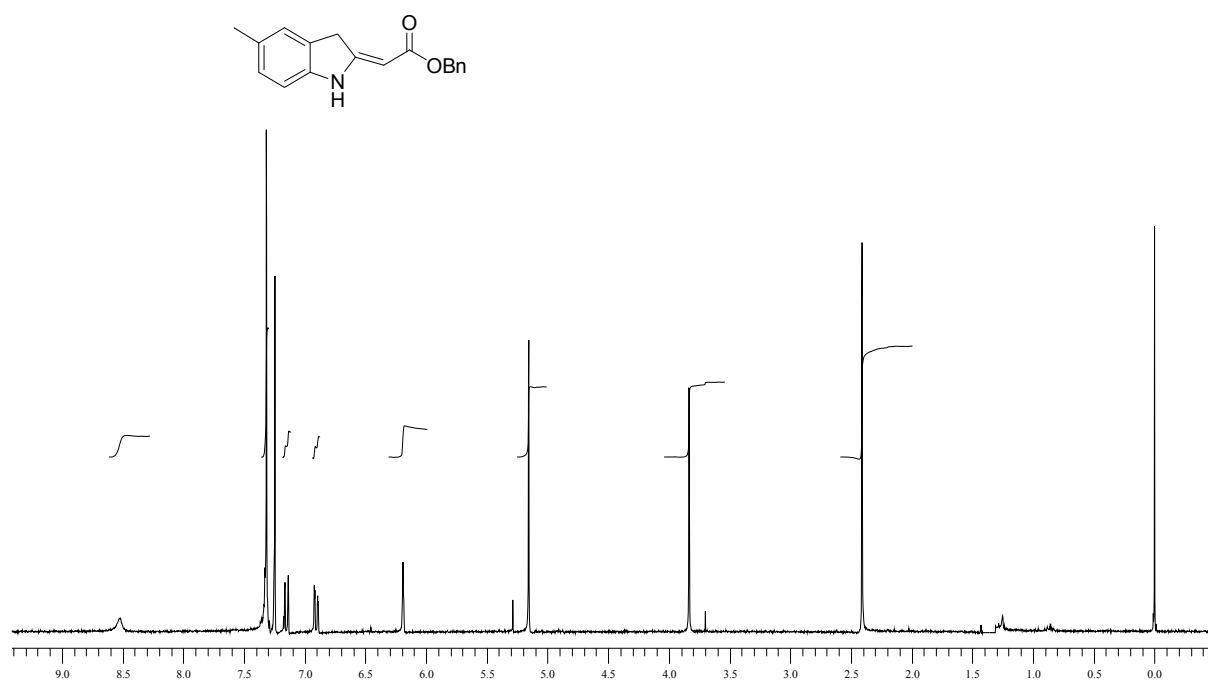

$^{13}\text{C}$  NMR of **3h** in  $\text{CDCl}_3$

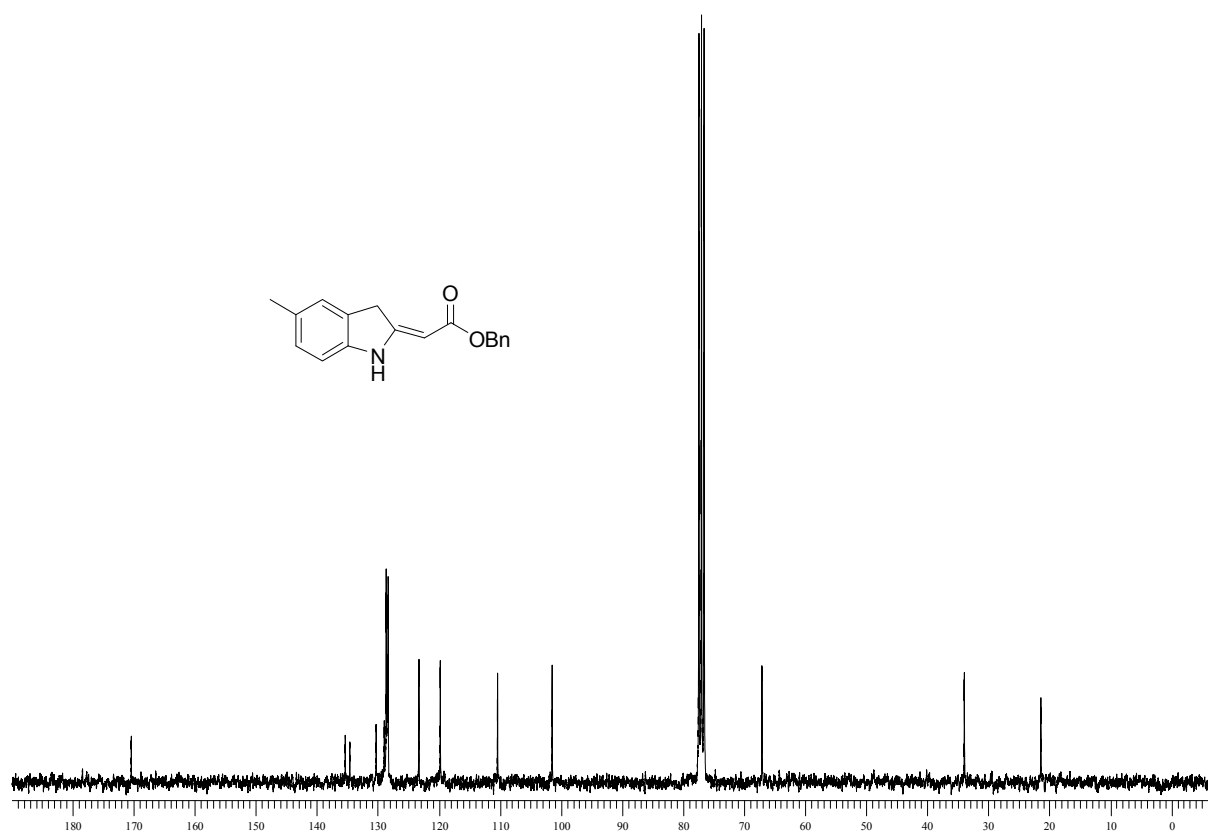



$^1\text{H}$  NMR of **3i** in  $\text{CDCl}_3$

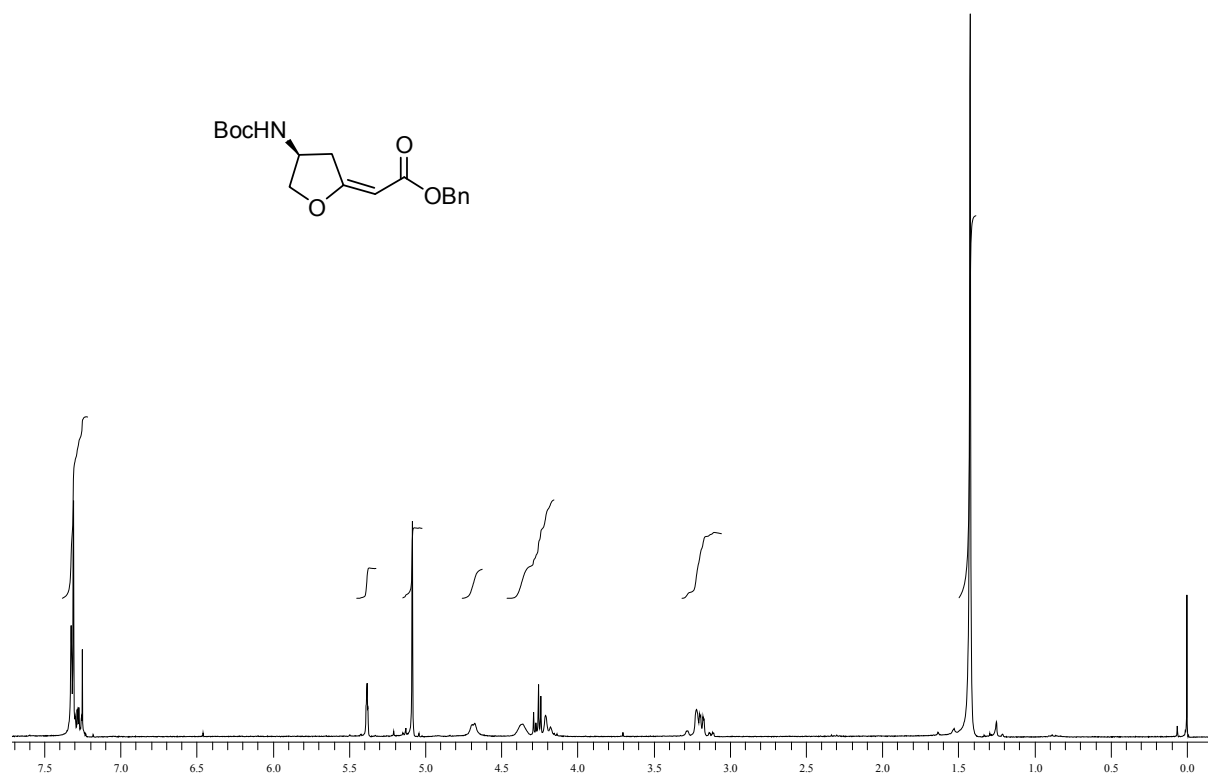

$^{13}\text{C}$  NMR of **3i** in  $\text{CDCl}_3$

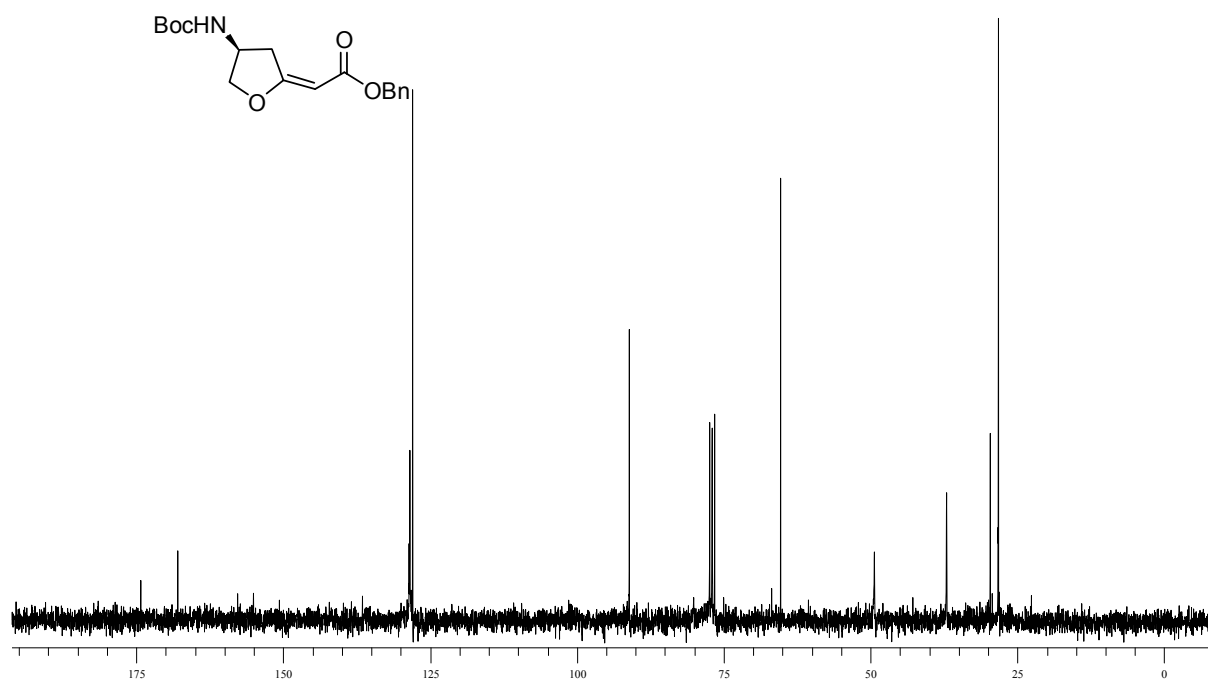

$^1\text{H}$  NMR of **3j** in  $\text{CDCl}_3$

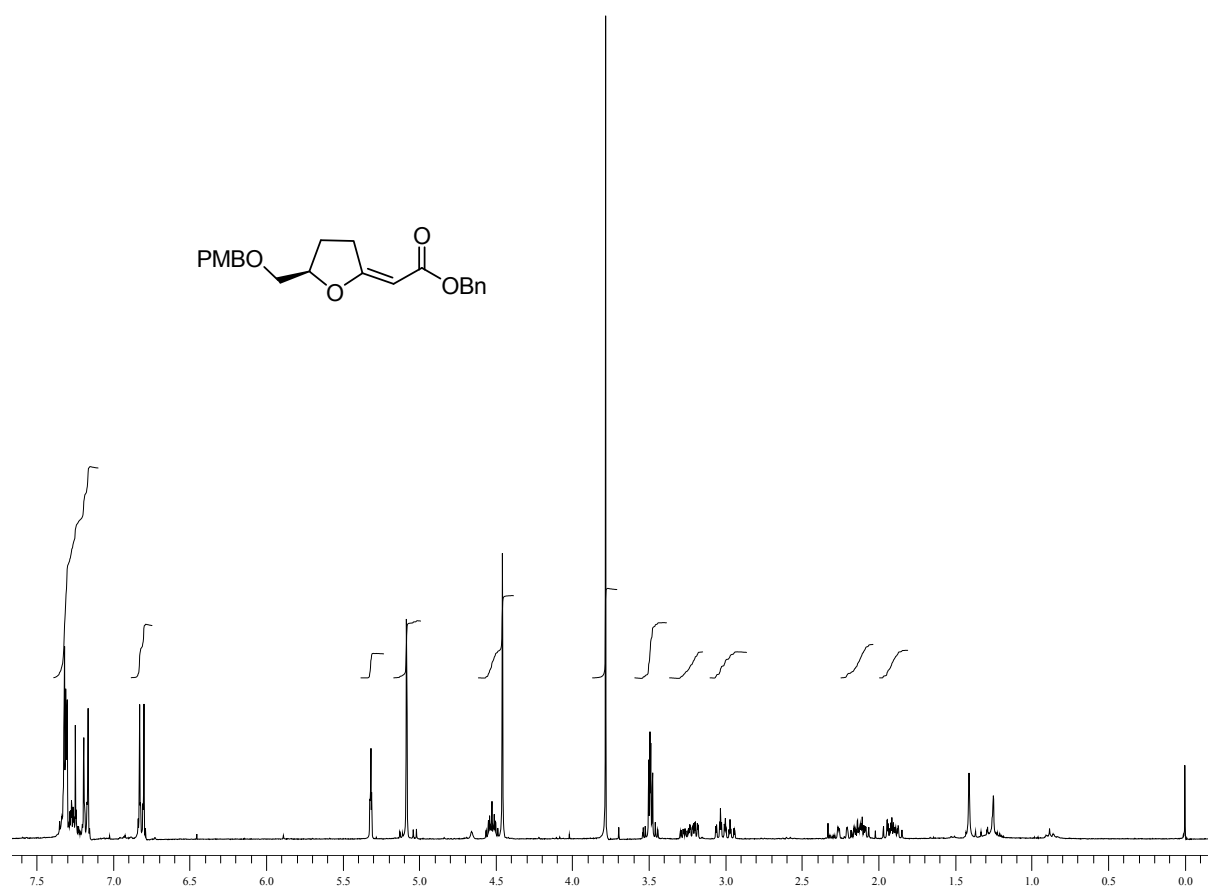

$^{13}\text{C}$  NMR of **3j** in  $\text{CDCl}_3$

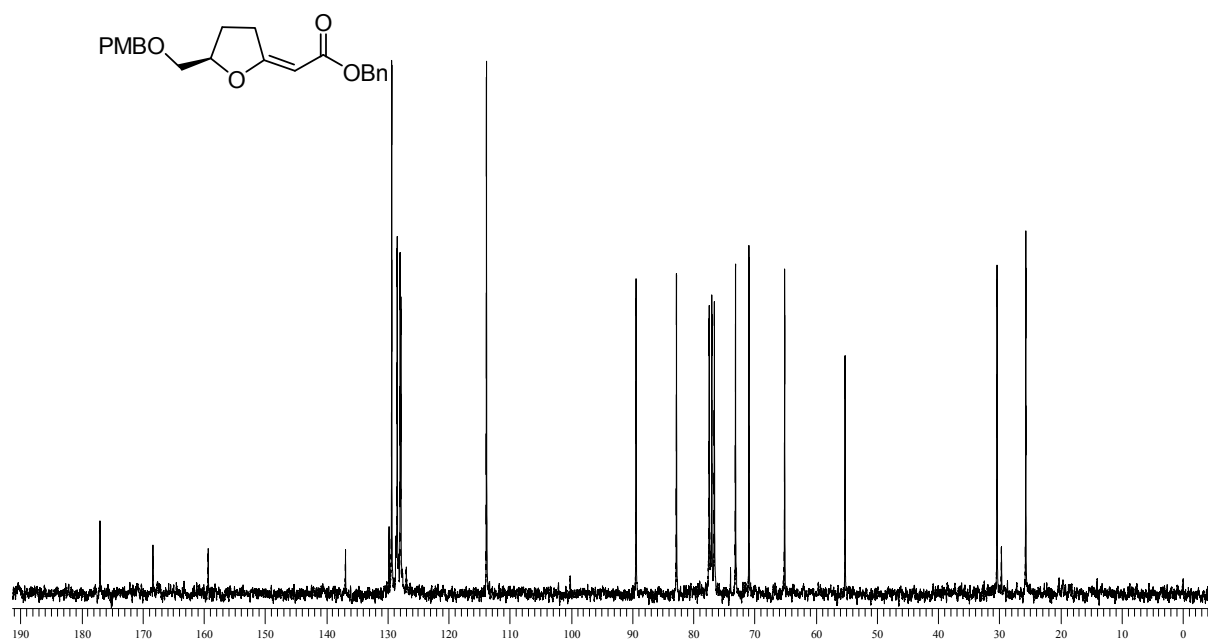

$^1\text{H}$  NMR of **3k** in  $\text{CDCl}_3$

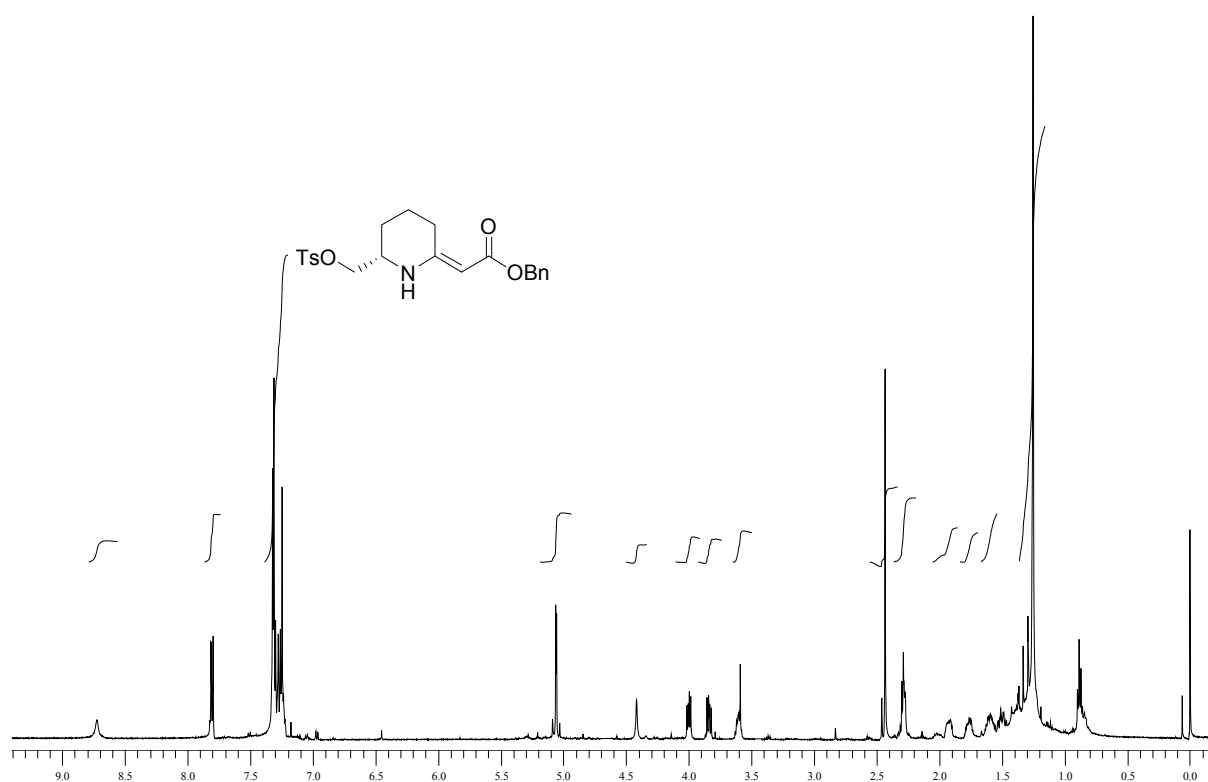

$^{13}\text{C}$  NMR of **3k** in  $\text{CDCl}_3$

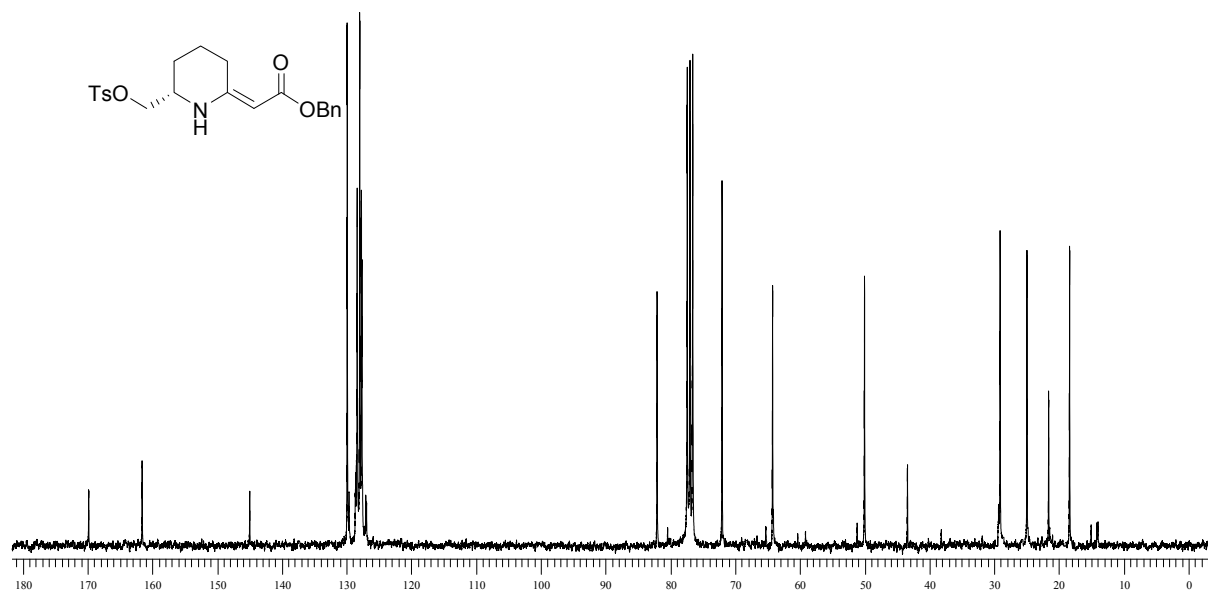

$^1\text{H}$  NMR of **3I** in  $\text{CDCl}_3$

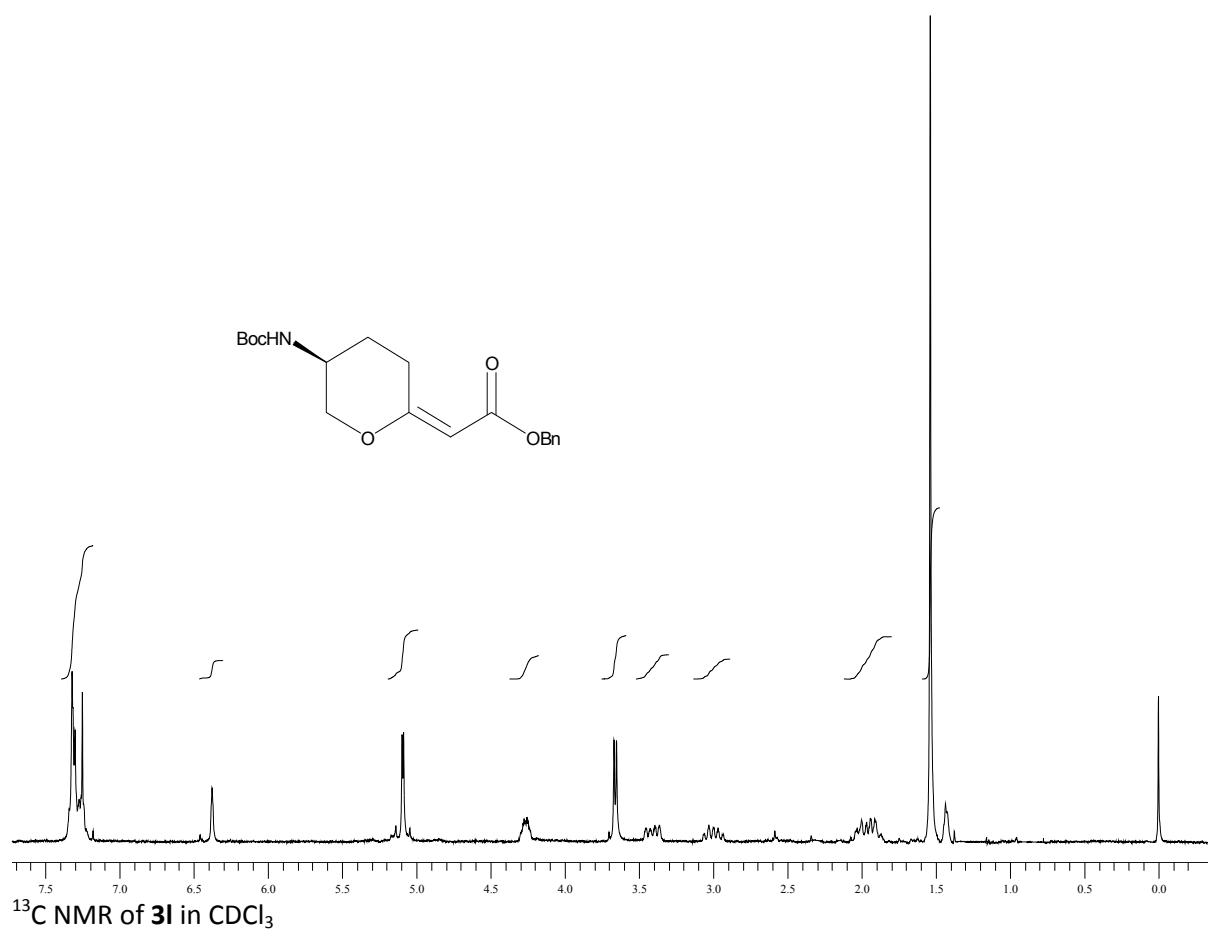

$^{13}\text{C}$  NMR of **3I** in  $\text{CDCl}_3$

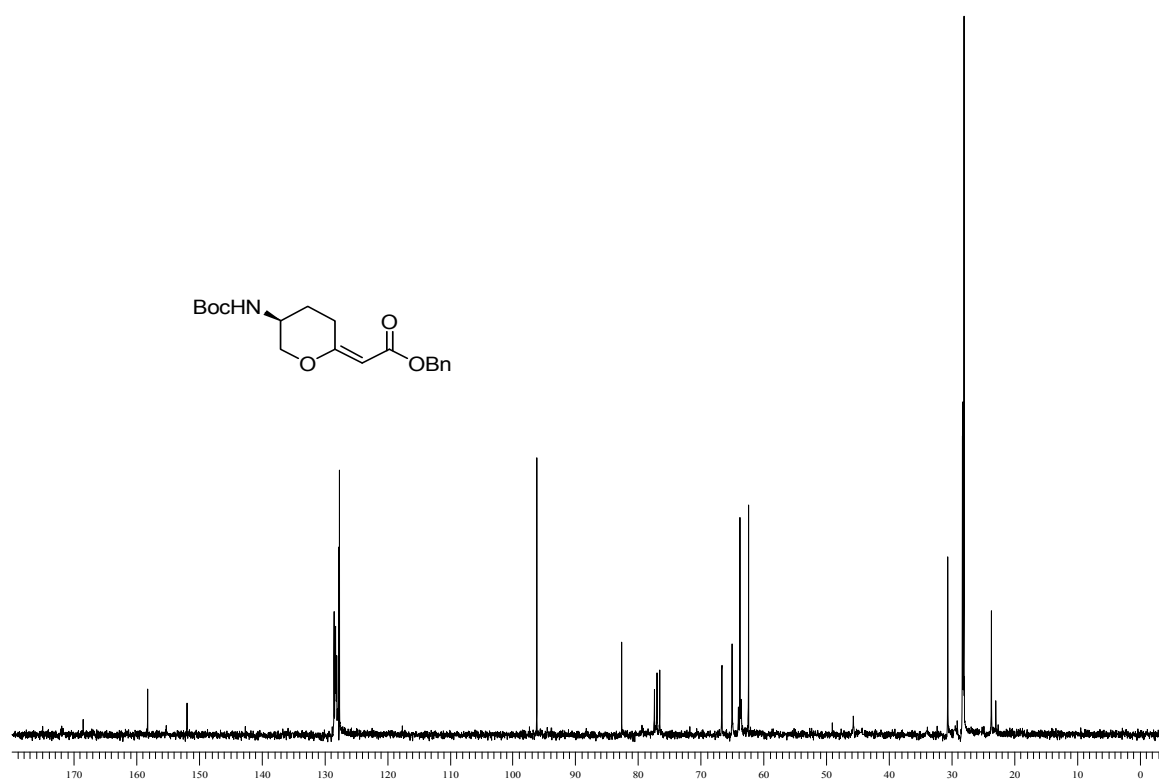

$^1\text{H}$  NMR of **3m** in  $\text{CDCl}_3$

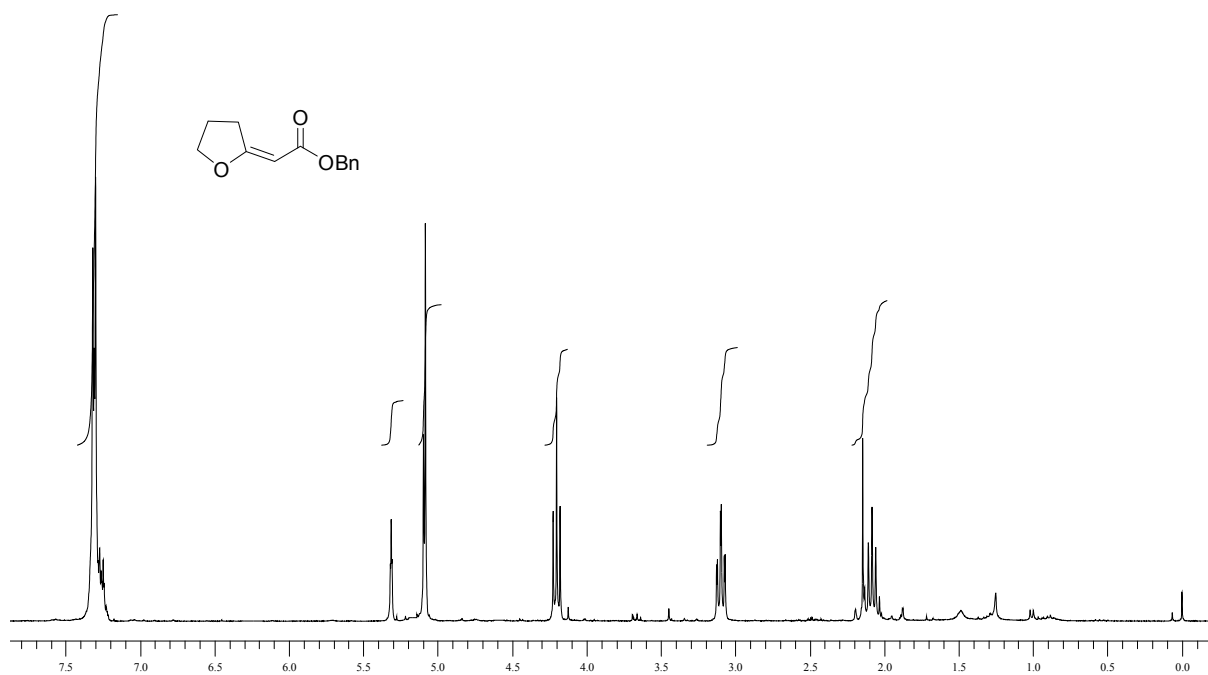

$^{13}\text{C}$  NMR of **3m** in  $\text{CDCl}_3$

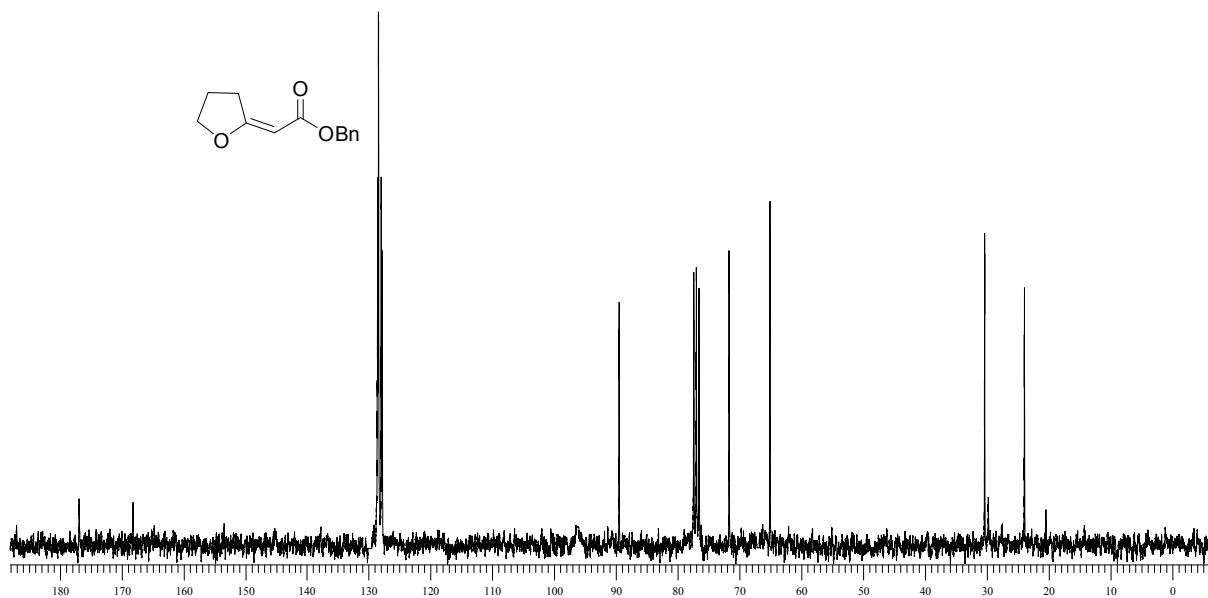

$^1\text{H}$  NMR of **3n** in  $\text{CDCl}_3$

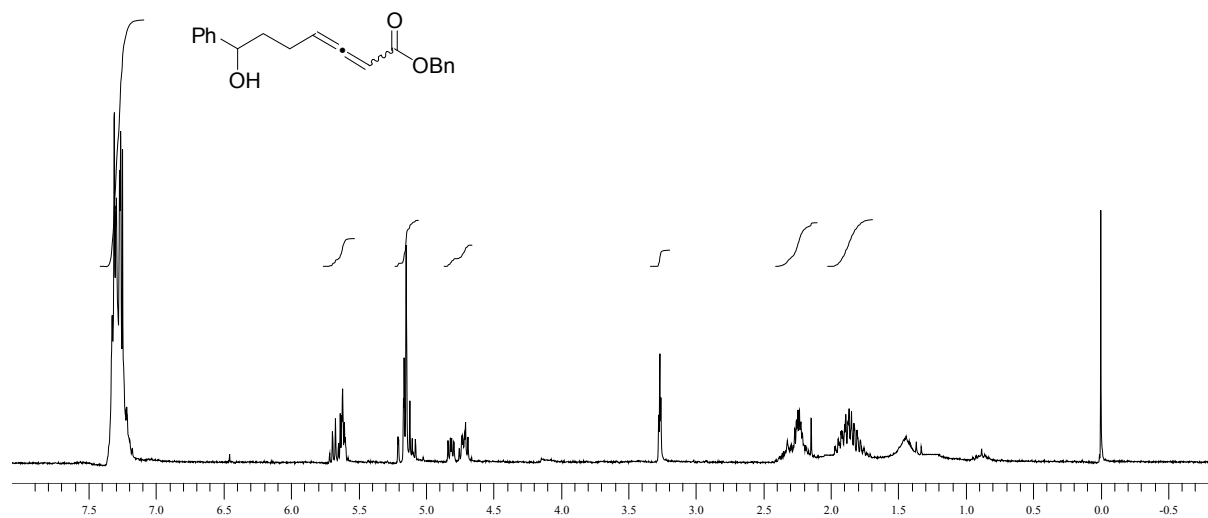

$^{13}\text{C}$  NMR of **3n** in  $\text{CDCl}_3$

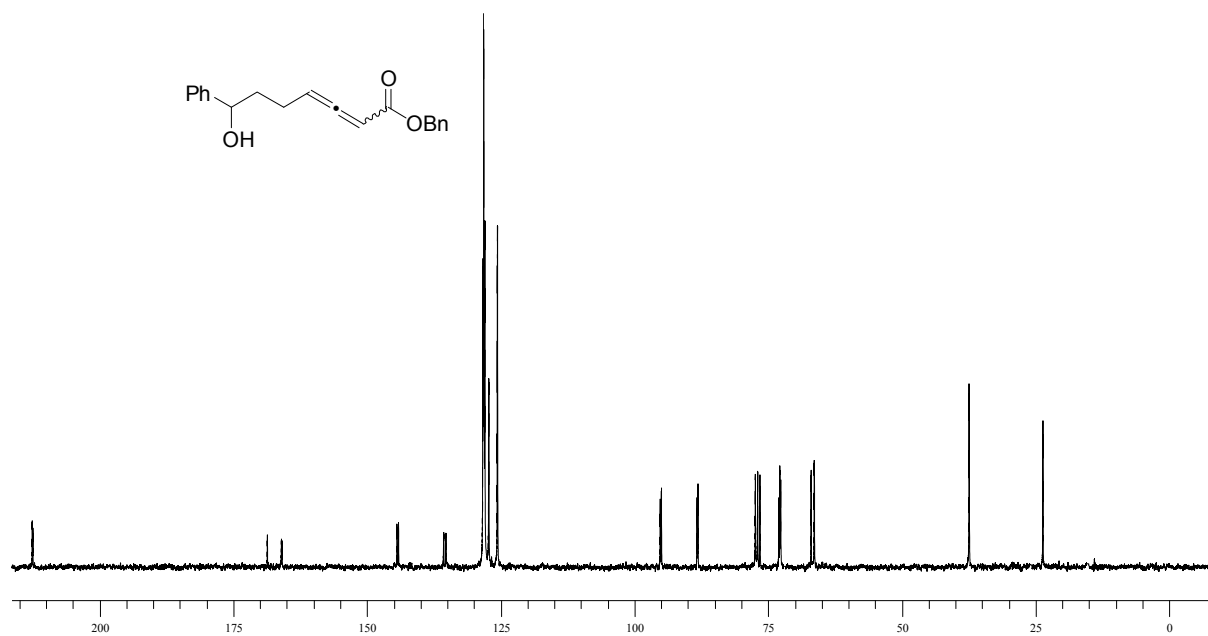

$^1\text{H}$  NMR of **5a** in  $\text{CDCl}_3$

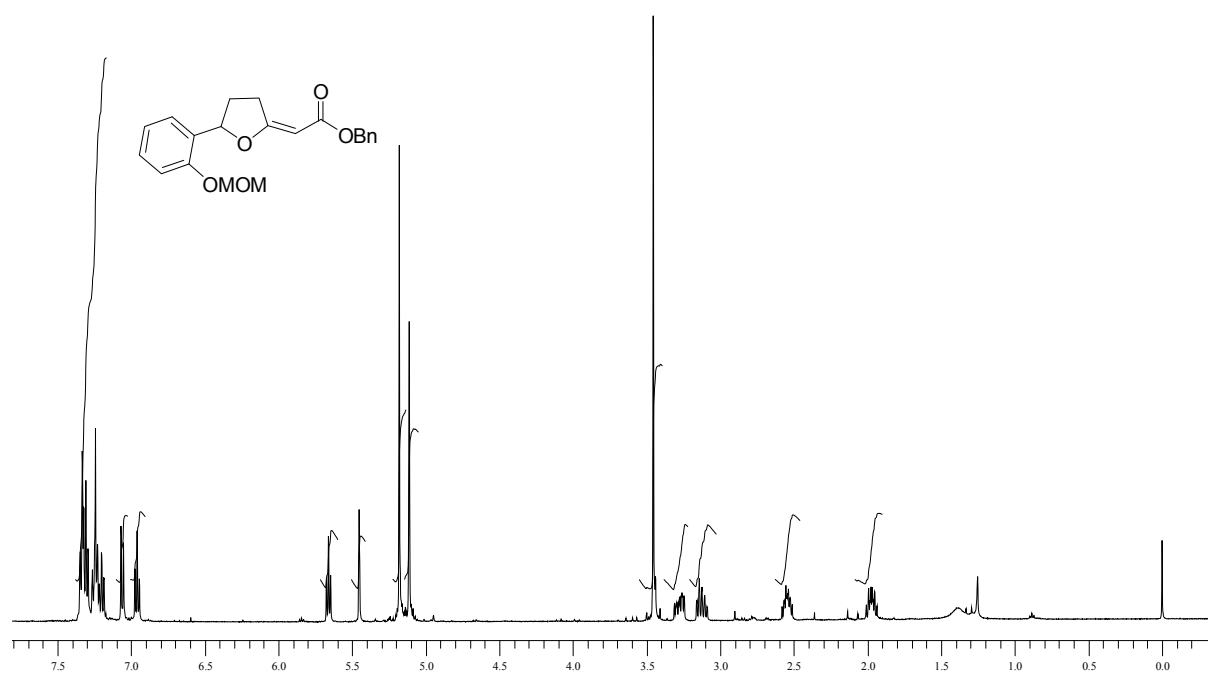

$^{13}\text{C}$  NMR of **5a** in  $\text{CDCl}_3$

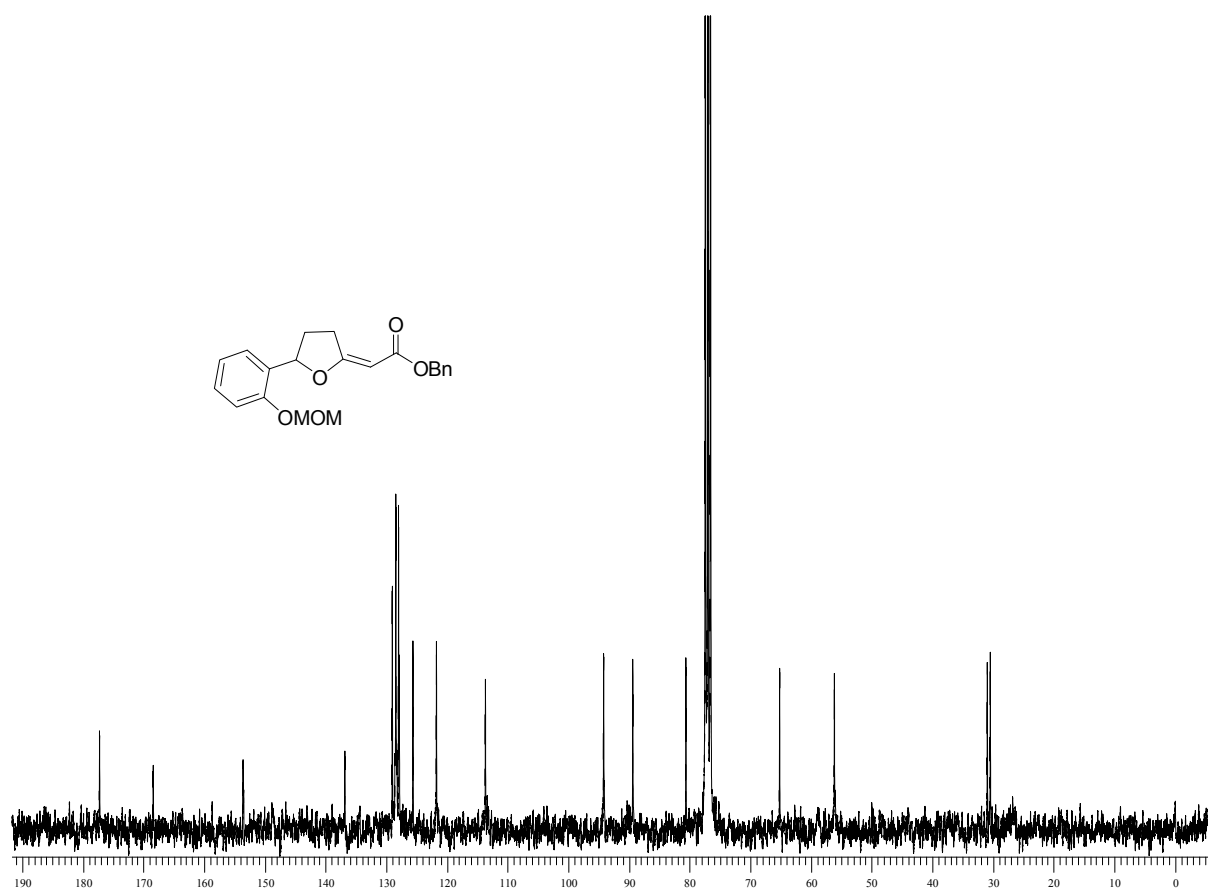

$^1\text{H}$  NMR of **5b** in  $\text{CDCl}_3$

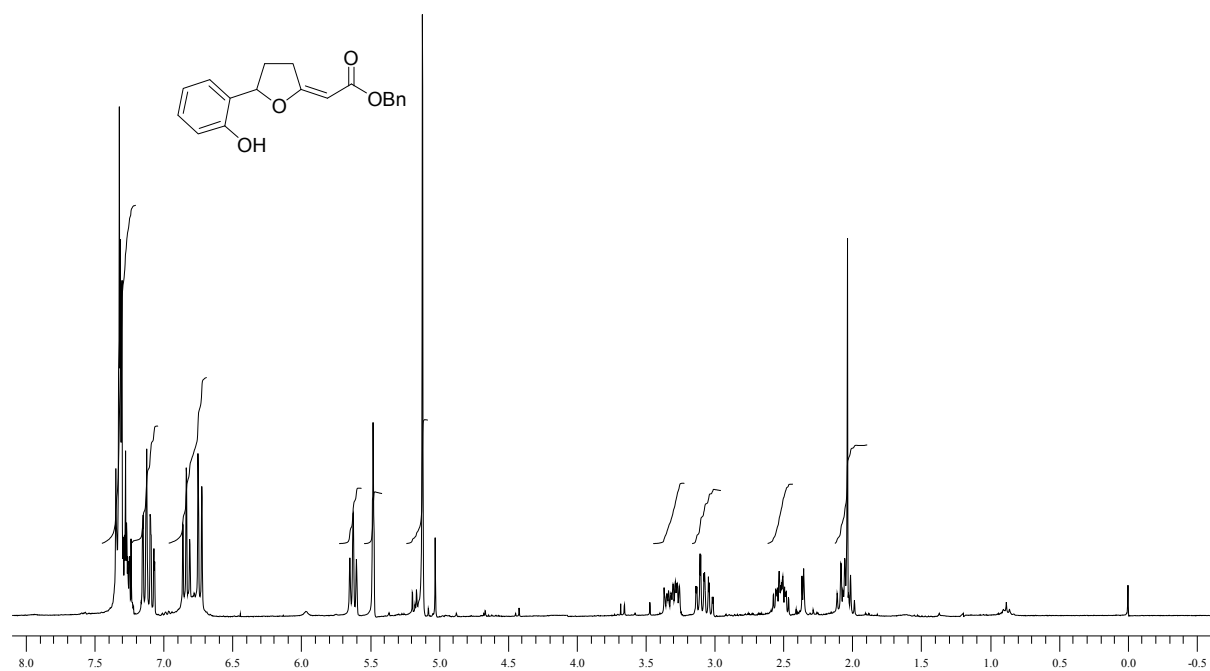

$^{13}\text{C}$  NMR of **5b** in  $\text{CDCl}_3$

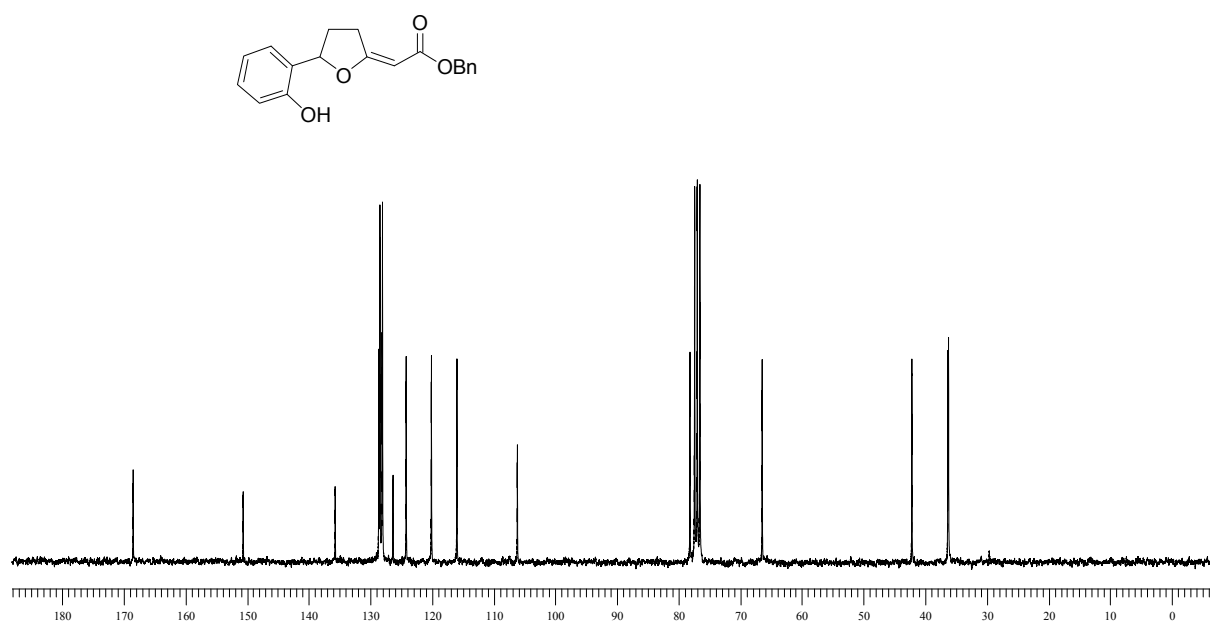



$^1\text{H}$  NMR of **5c** in  $\text{CDCl}_3$

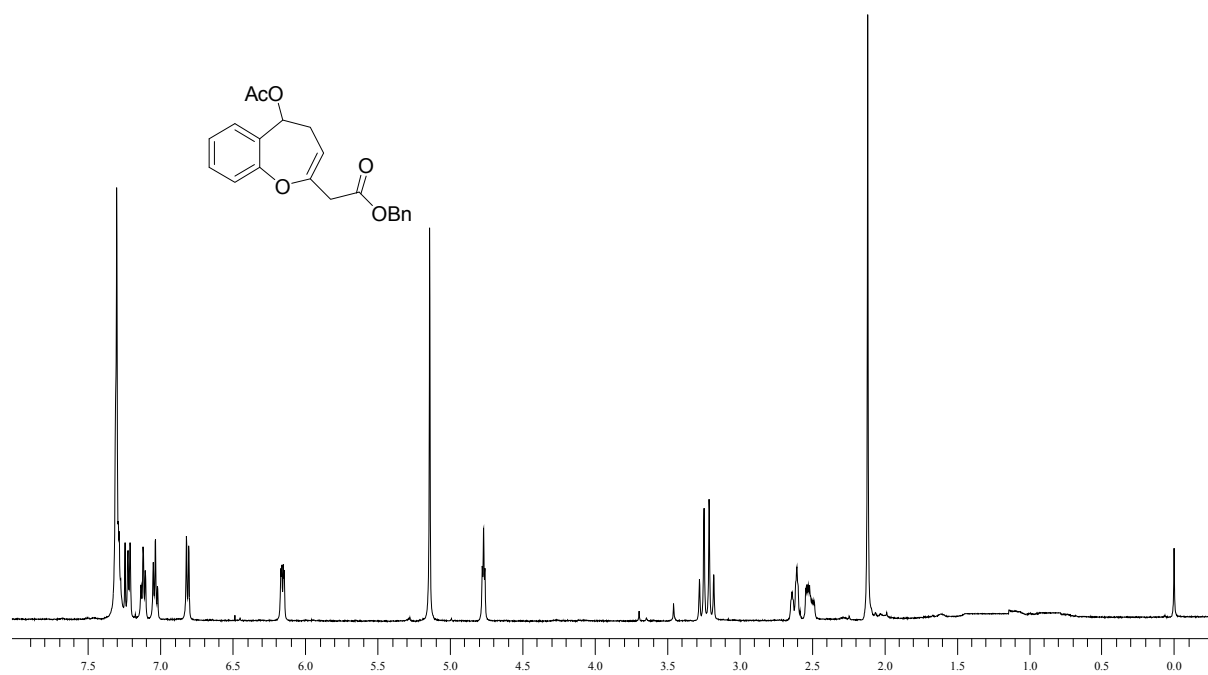

$^{13}\text{C}$  NMR of **5c** in  $\text{CDCl}_3$

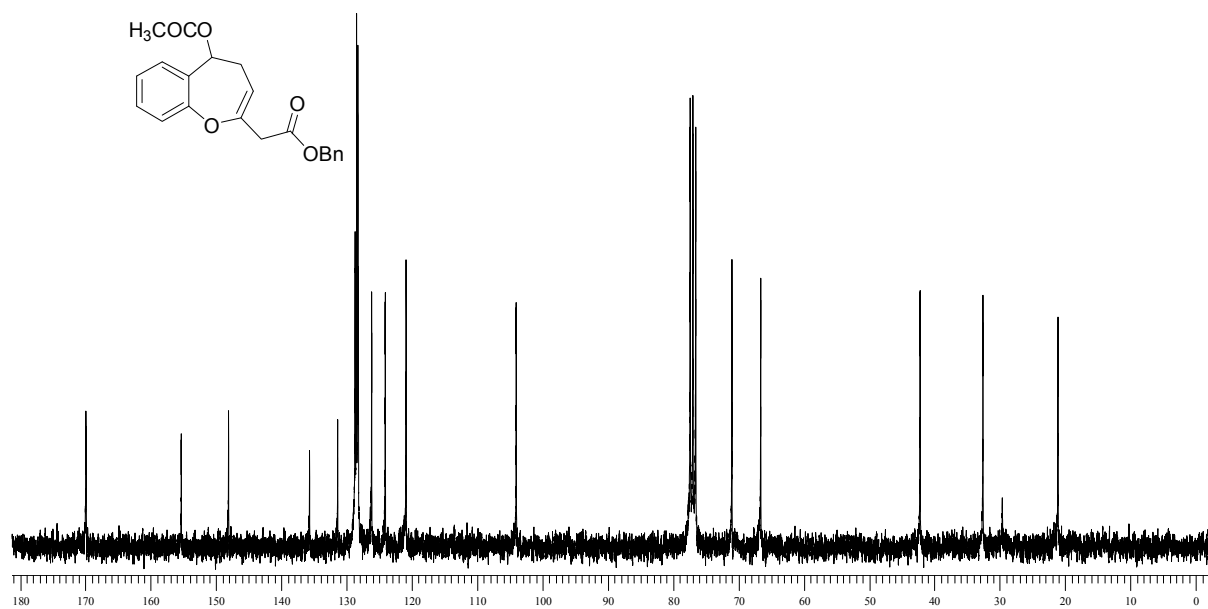

$^1\text{H}$  NMR of **7** in  $\text{CDCl}_3$

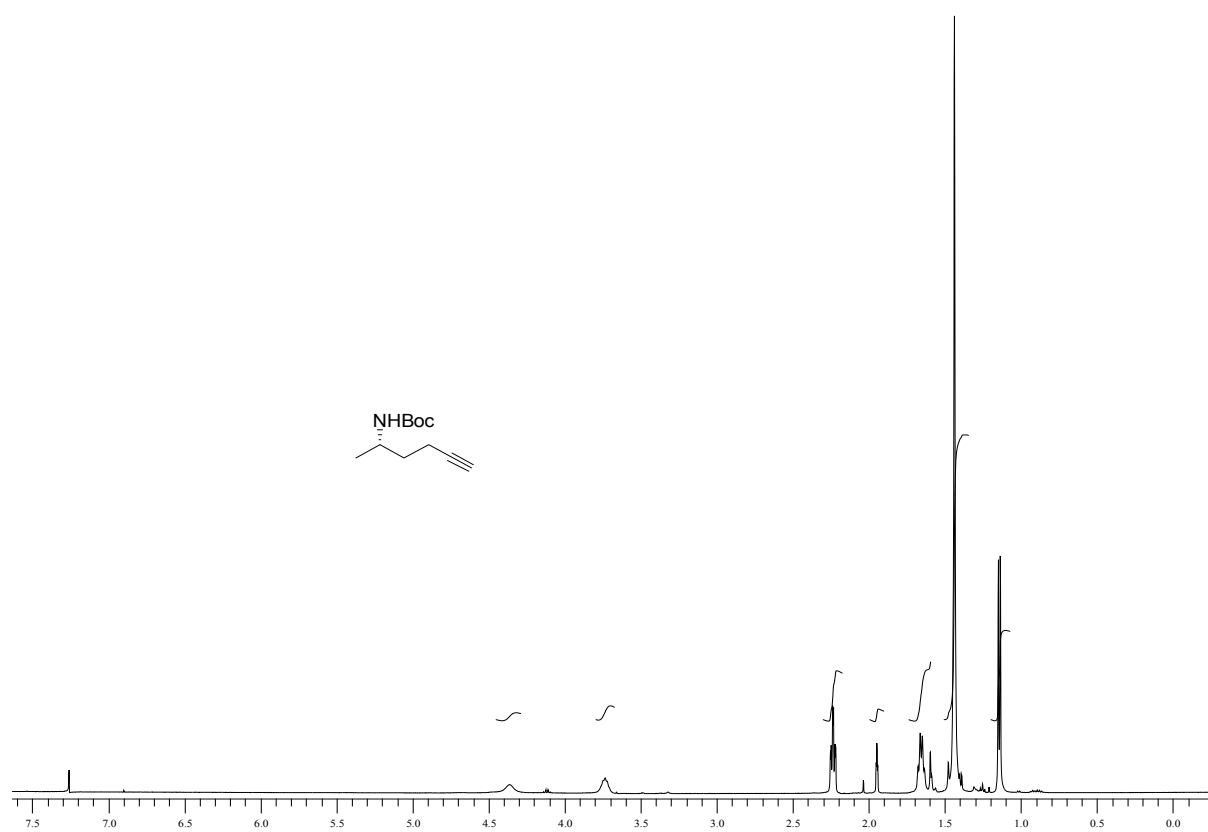

$^{13}\text{C}$  NMR of **7** in  $\text{CDCl}_3$

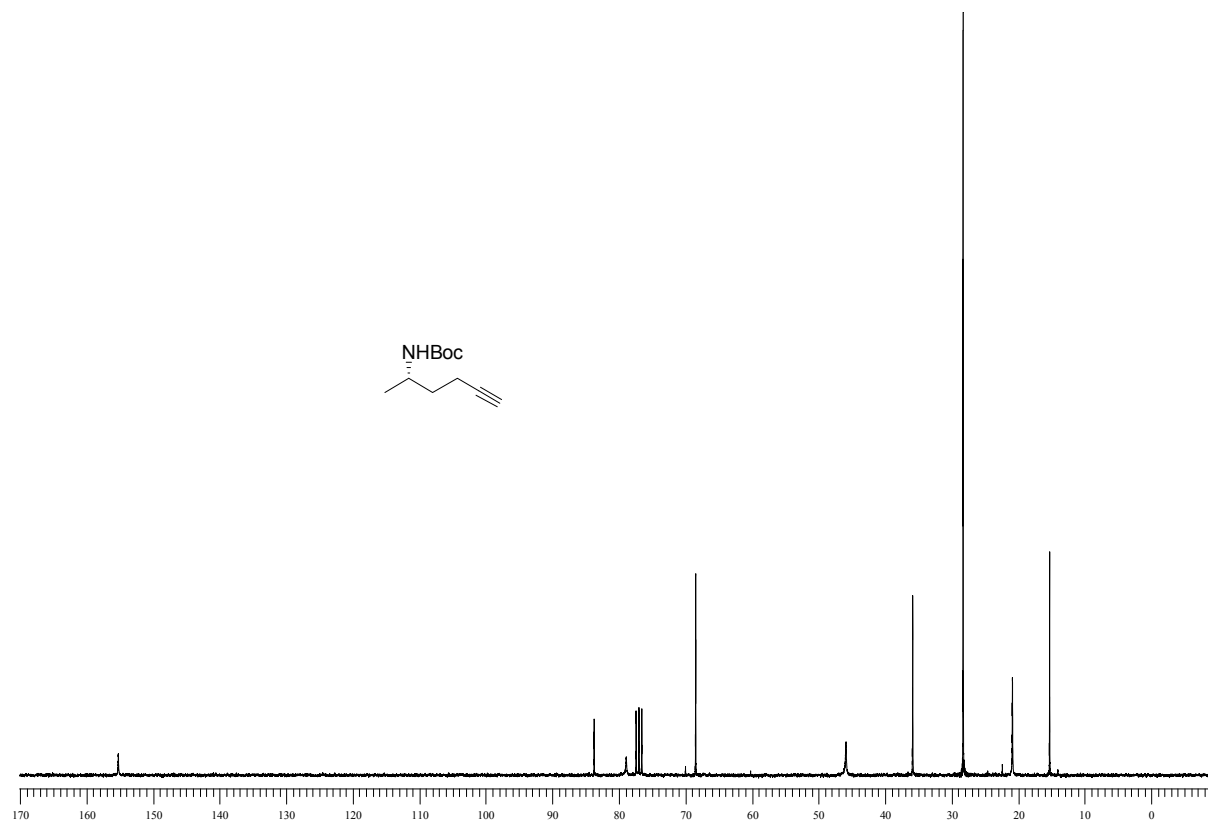

$^1\text{H}$  NMR of **8** in  $\text{CDCl}_3$

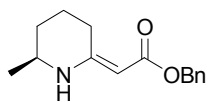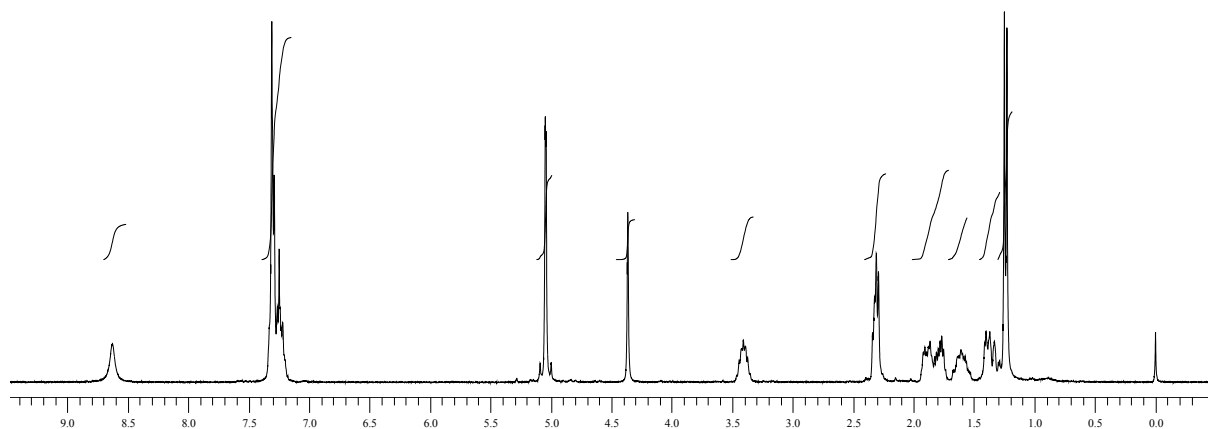

$^{13}\text{C}$  NMR of **8** in  $\text{CDCl}_3$

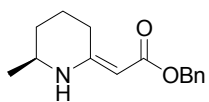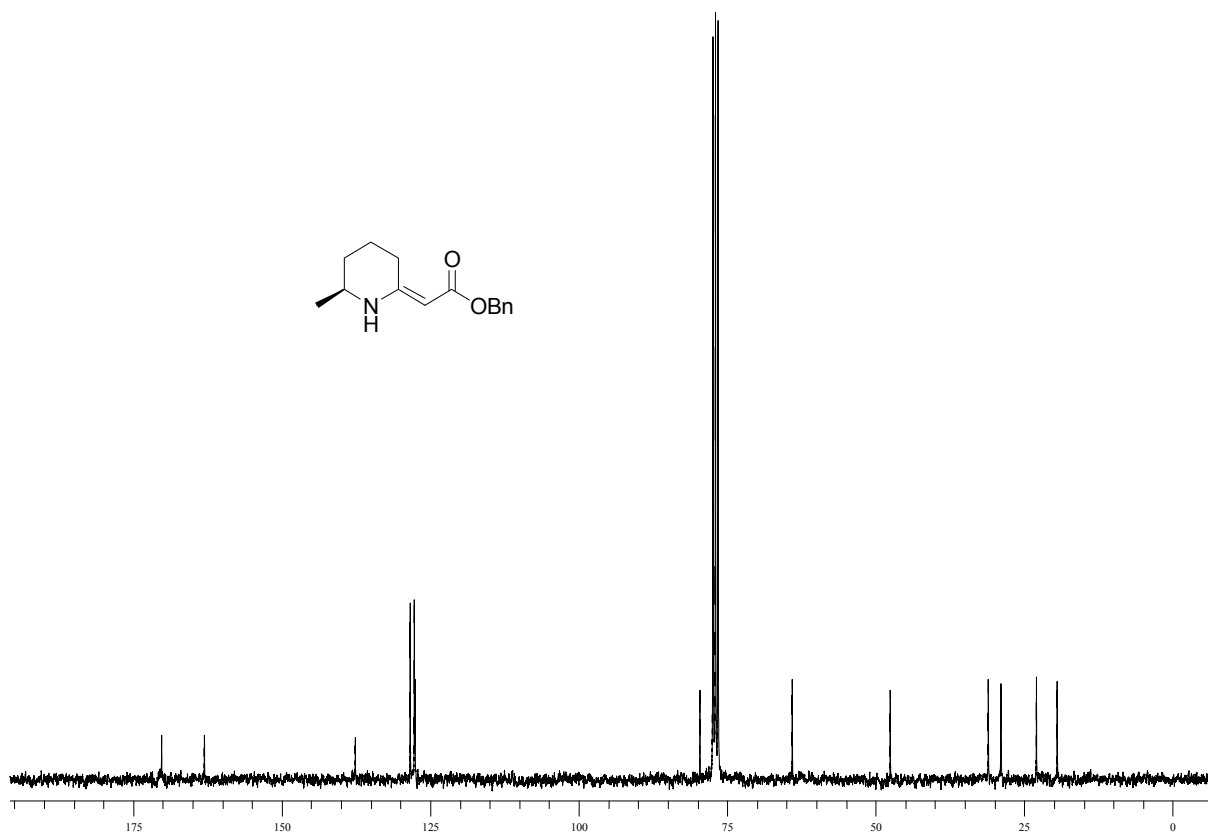

$^1\text{H}$  NMR of **9** in  $\text{CD}_3\text{OD}$

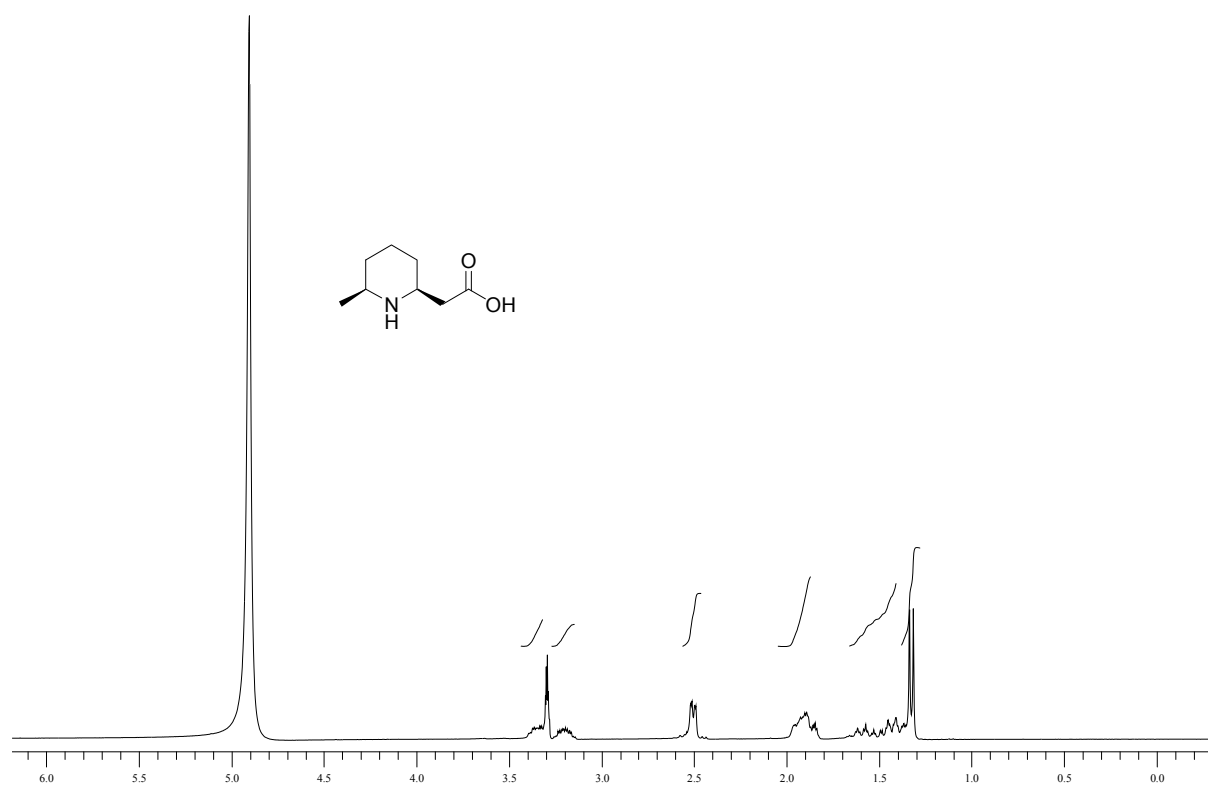

$^{13}\text{C}$  NMR of **9** in  $\text{CD}_3\text{OD}$

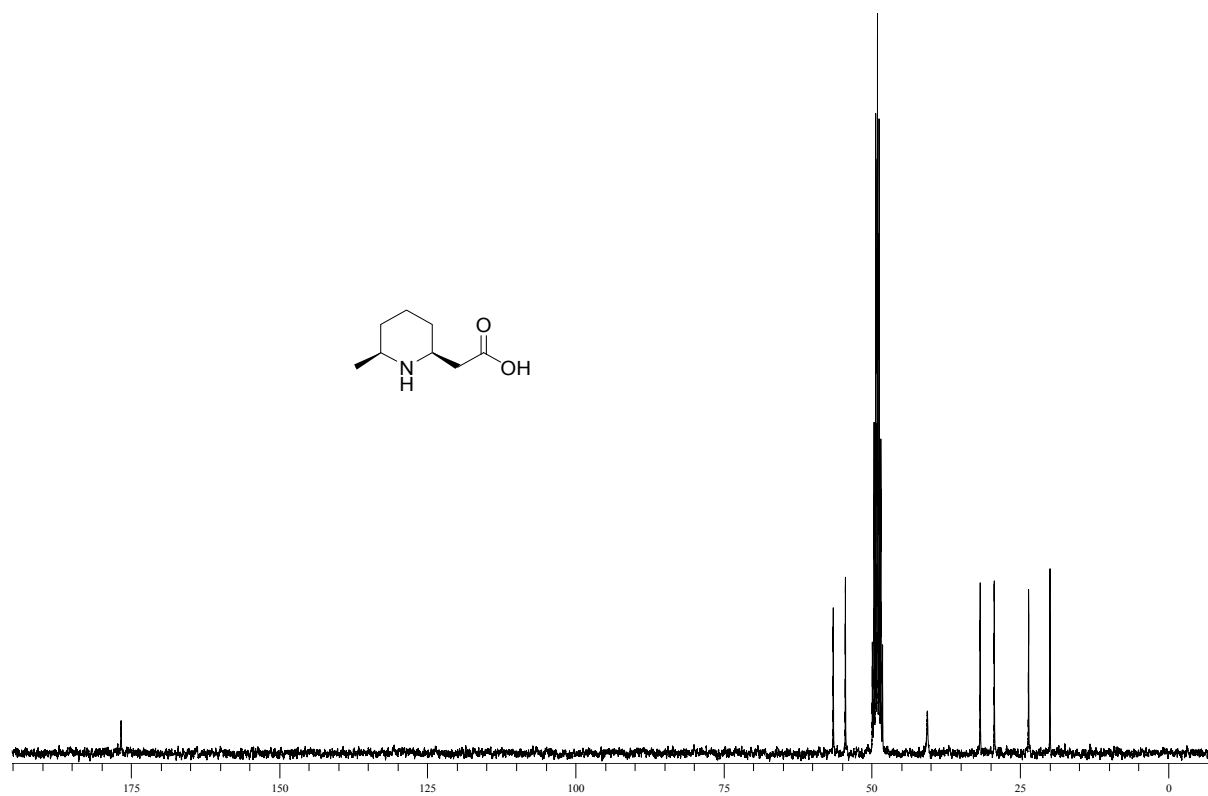

$^1\text{H}$  NMR of **10** in  $\text{CDCl}_3$

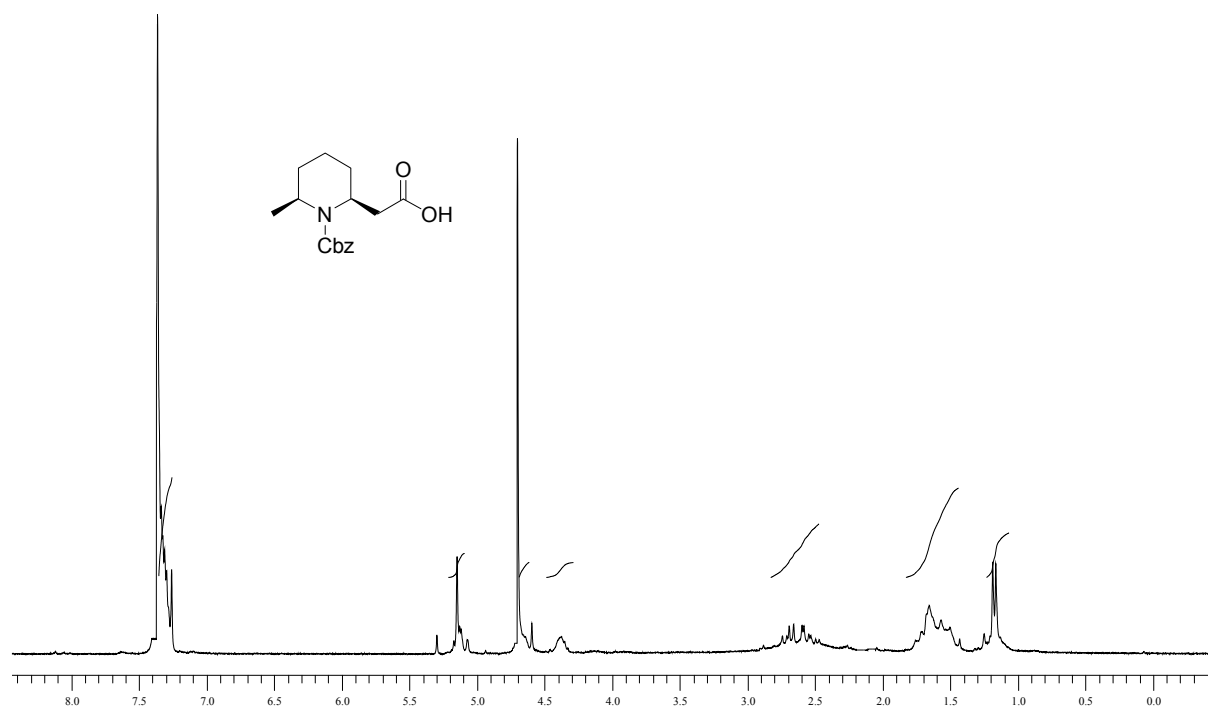

$^{13}\text{C}$  NMR of **10** in  $\text{CDCl}_3$

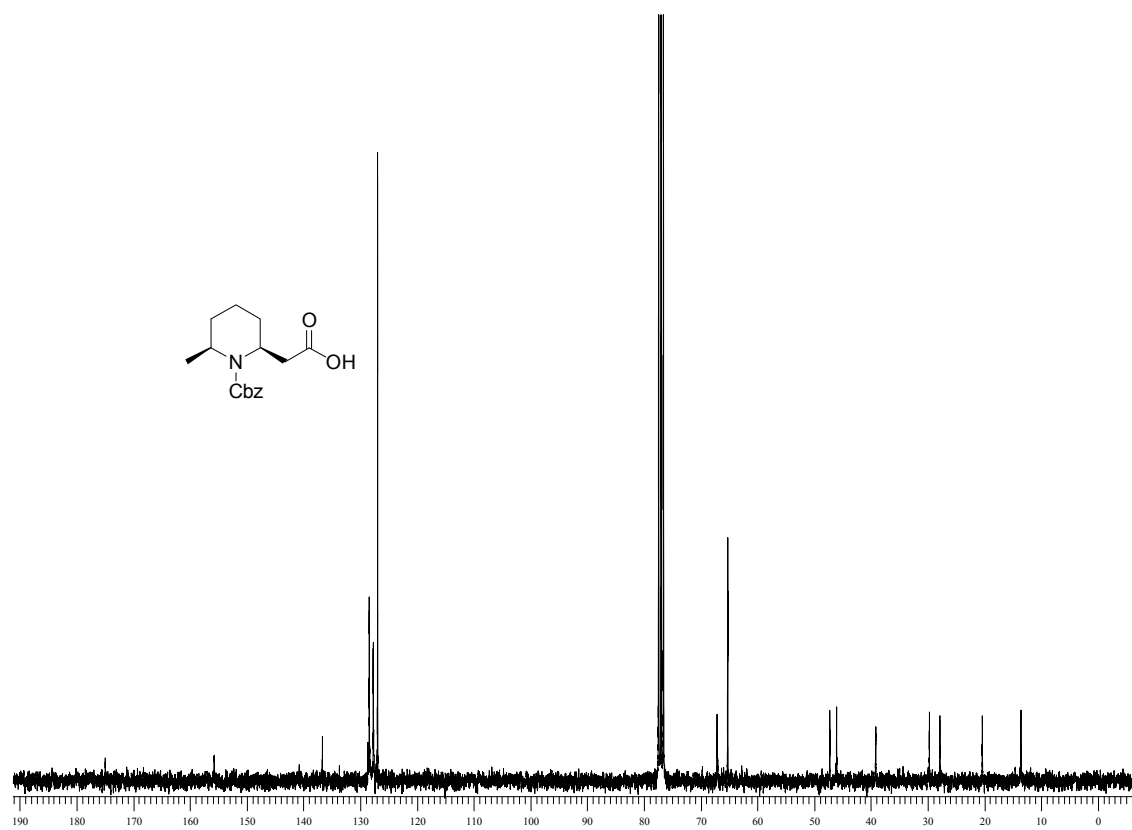

$^1\text{H}$  NMR of **11** in  $\text{CDCl}_3$

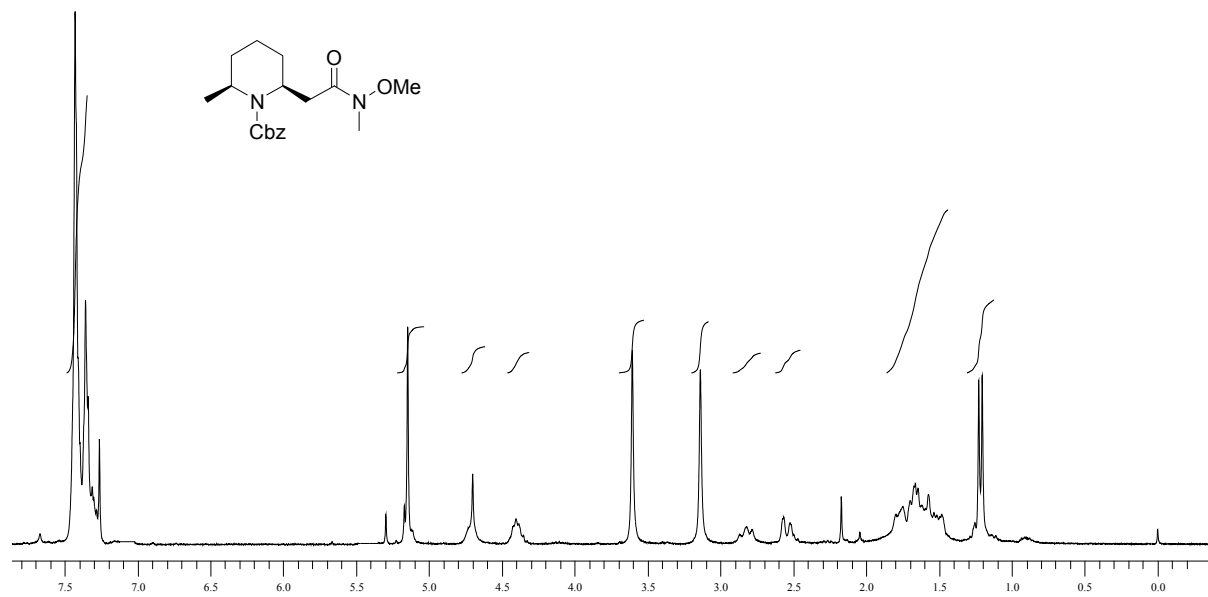

$^{13}\text{C}$  NMR of **11** in  $\text{CDCl}_3$

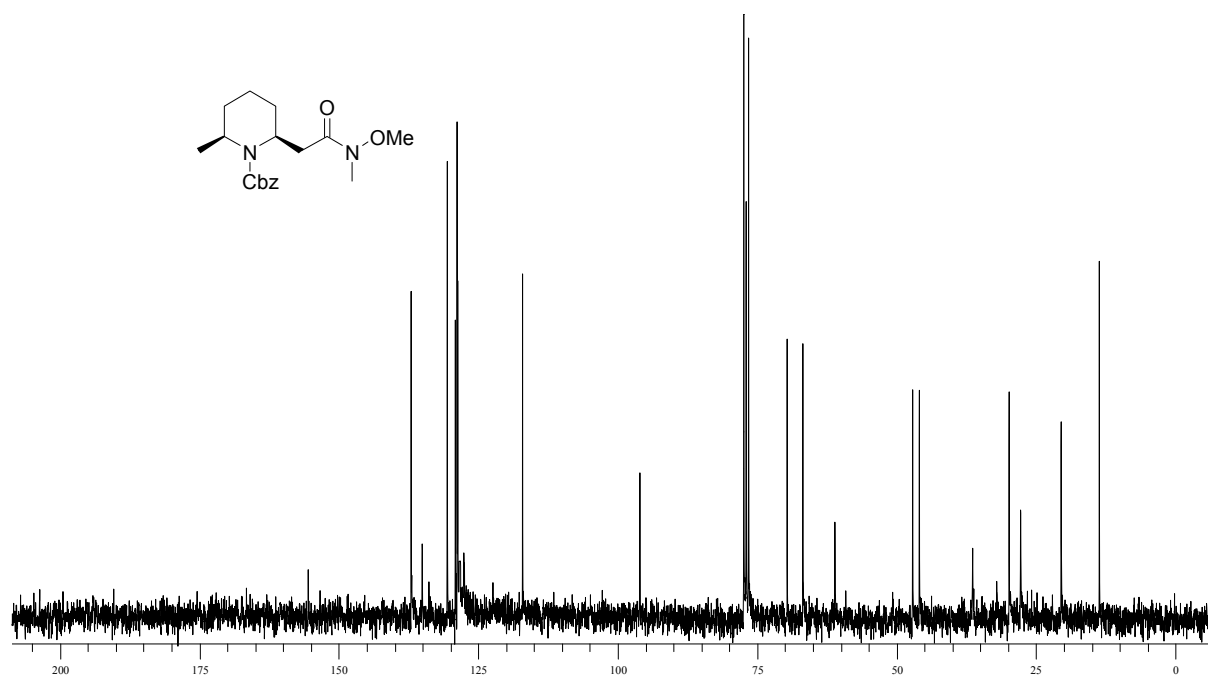

$^1\text{H}$  NMR of **12** in  $\text{CDCl}_3$

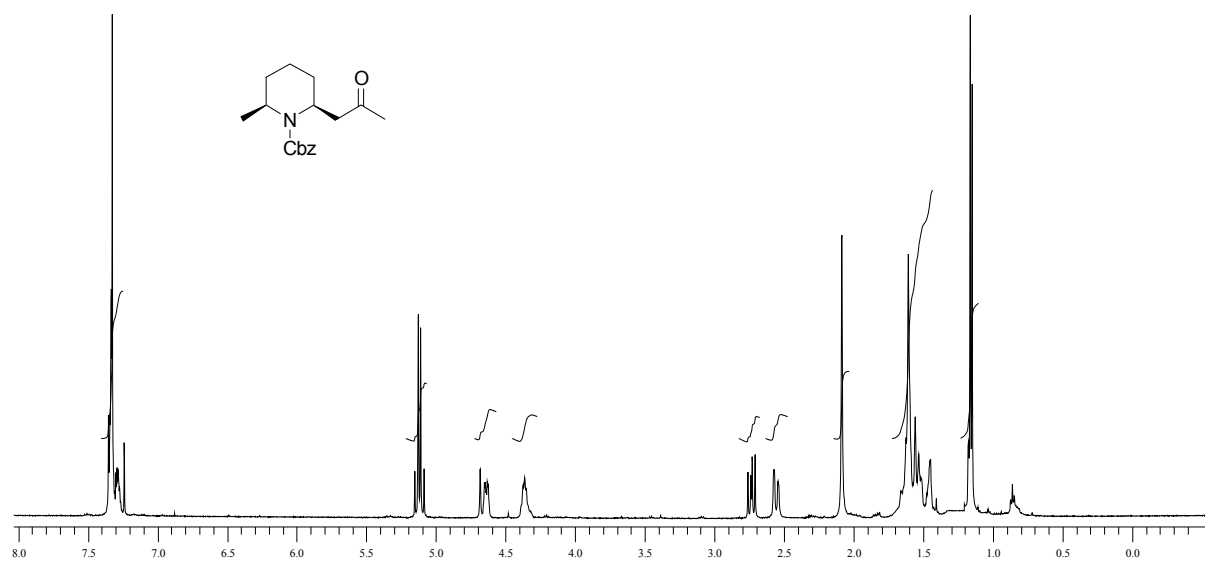

$^{13}\text{C}$  NMR of **12** in  $\text{CDCl}_3$

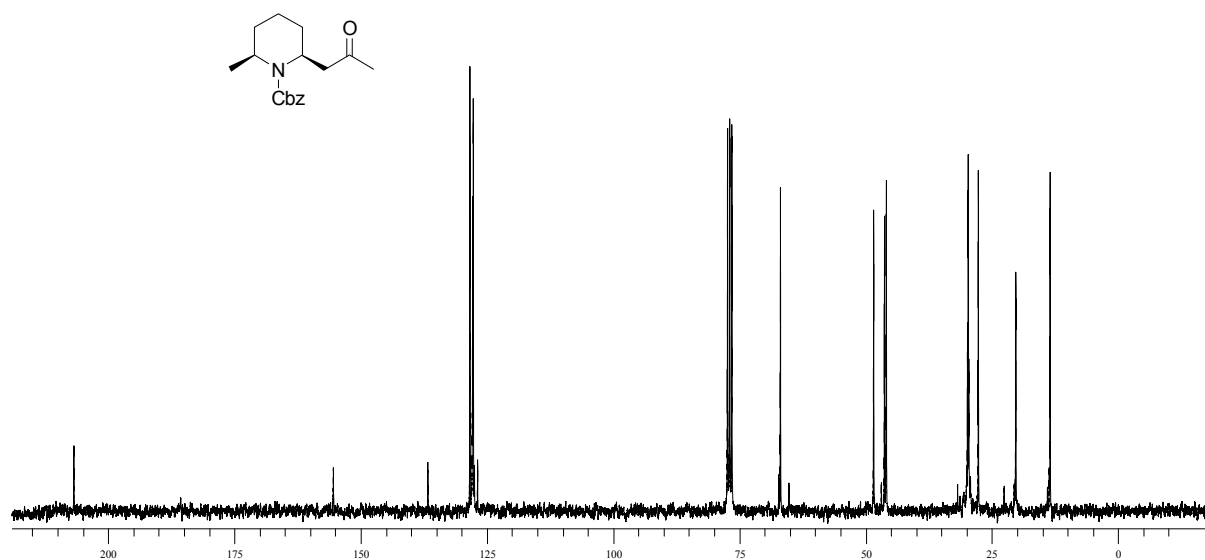

$^1\text{H}$  NMR of **13** in  $\text{CDCl}_3$

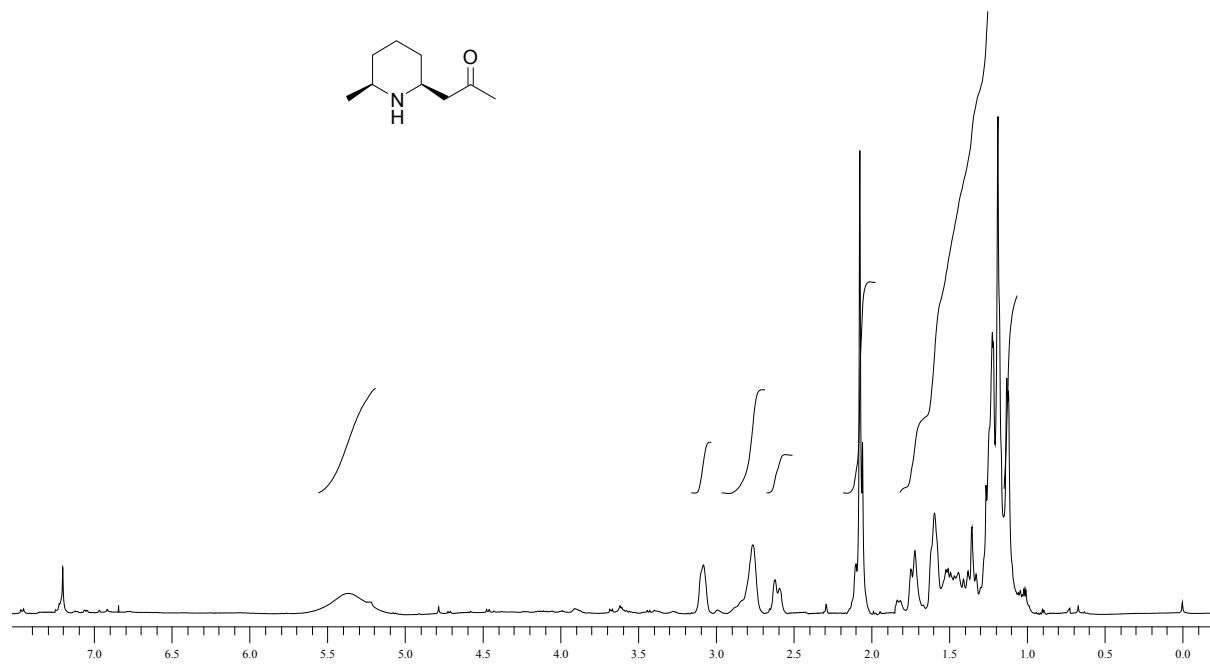

$^{13}\text{C}$  NMR of **13** in  $\text{CDCl}_3$

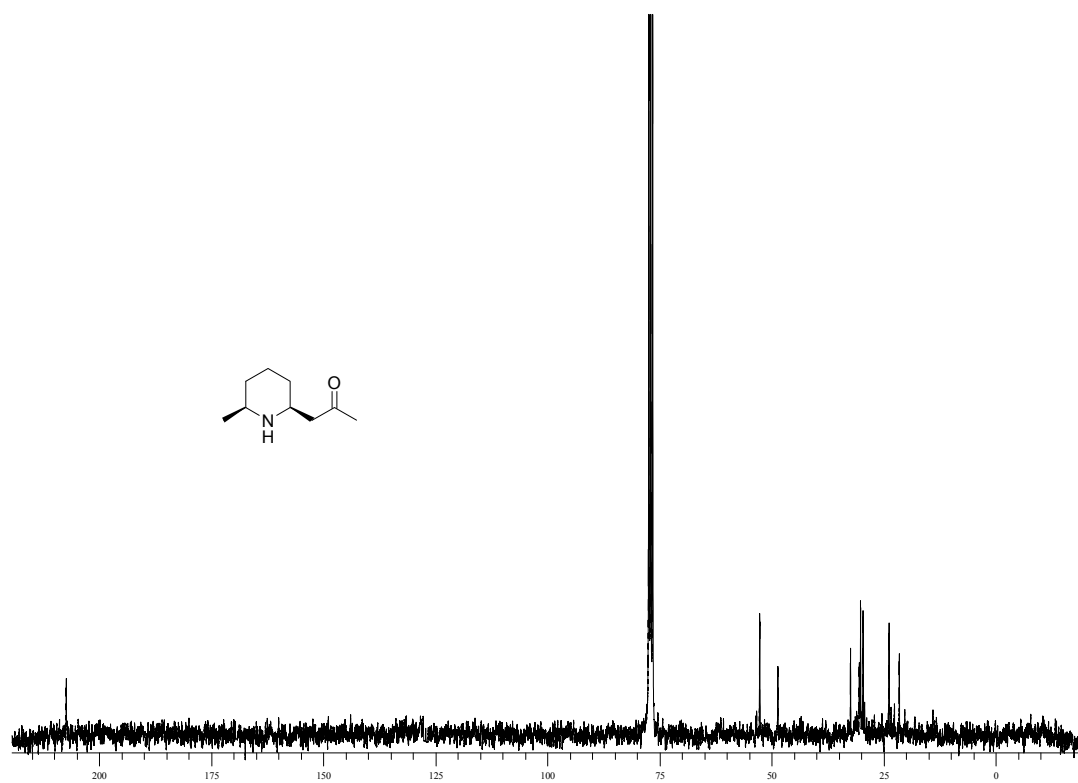



Tue, 8th Feb, 2011 16:59:37

RSPHN955

Page 1

Sample ID :  
 Amount : **20**  
 Raw Data : **rspn955**  
 Primary : **rspn955**  
 Project : **work1**

Analyst : **balu**  
 Dilution : **1**  
 From : **Wed, 1st Jan, 2003 9:11:40**  
 Calibration : **(none)**  
 Style : **report**

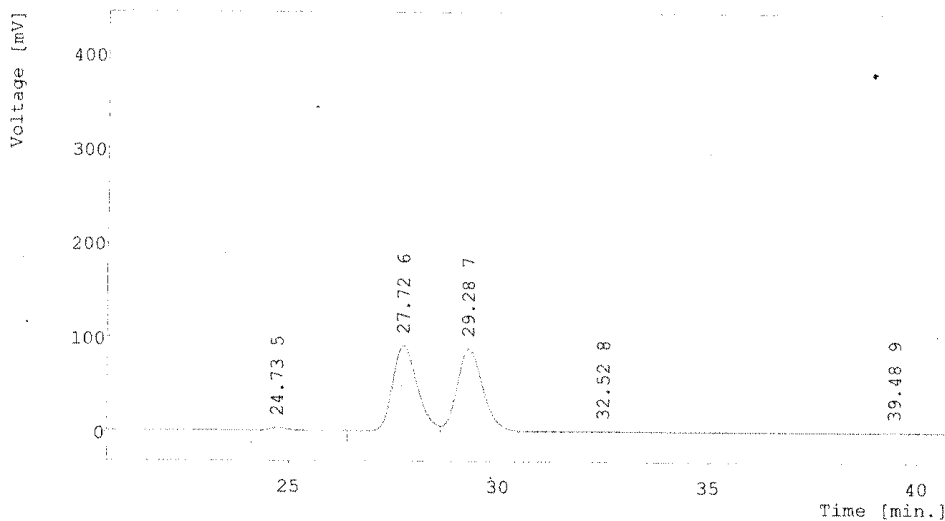

Result Table - Calculation Method Uncal

| Peak No. | Reten. time | Area [mV.s] | Height [mV] | W05 [min.] | Area [%] | Height [%] |
|----------|-------------|-------------|-------------|------------|----------|------------|
| 1        | 6.200       | 24.0262     | 1.4104      | 0.2000     | 0.3115   | 0.7654     |
| 2        | 9.267       | 30.5502     | 0.3671      | 0.9600     | 0.3961   | 0.1992     |
| 3        | 10.907      | 8.4745      | 0.2539      | 0.6667     | 0.1099   | 0.1378     |
| 4        | 13.240      | 18.9943     | 0.2579      | 0.3067     | 0.2463   | 0.1400     |
| 5        | 24.733      | 95.1988     | 2.9296      | 0.5067     | 1.2344   | 1.5898     |
| 6        | 27.720      | 3716.1894   | 90.5392     | 0.6400     | 48.1868  | 49.1330    |
| 7        | 29.280      | 3770.8966   | 87.5167     | 0.6667     | 48.8961  | 47.4928    |
| 8        | 32.520      | 16.4056     | 0.3930      | 0.6800     | 0.2127   | 0.2133     |
| 9        | 39.480      | 31.3196     | 0.6059      | 0.8267     | 0.4062   | 0.3287     |
| -        | Total       | 7712.0551   | 184.2738    |            |          |            |

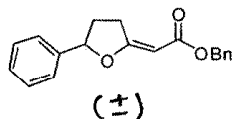

Mobile Phase: Hexane: IPA, 95:5

Flow rate : 0.5 mL/min

$\lambda$  : 254 nm

Tue, 8th Feb, 2011 17:03:06

CHPHE955

Page 1

Sample ID : **rsphe955**  
Sample : **rsphe955**  
Amount : **20**  
Raw Data : **chphe955**  
Primary : **chphe955**  
Project : **work1**

Analyst : **balakishan**  
Dilution : **1**  
From : **Wed, 1st Jan, 2003 6:55:38**  
Calibration : **(none)**  
Style : **report**

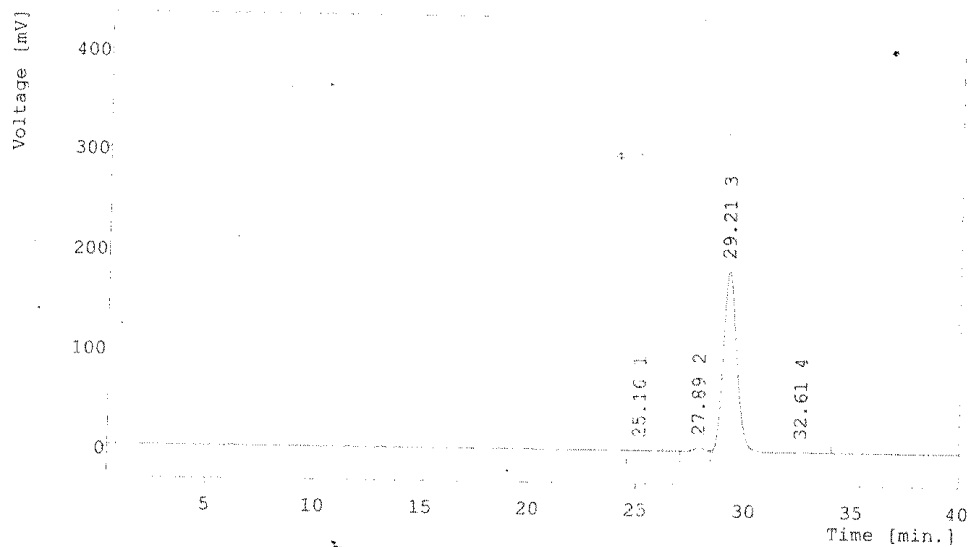

Result Table - Calculation Method Uncal

| Peak No. | Reten. time | Area [mV.s] | Height [mV] | W05 [min.] | Area [%] | Height [%] |
|----------|-------------|-------------|-------------|------------|----------|------------|
| 1        | 25.160      | 14.2391     | 0.4117      | 0.5333     | 0.1771   | 0.2210     |
| 2        | 27.893      | 135.2253    | 3.5811      | 0.6267     | 1.6821   | 1.9227     |
| 3        | 29.213      | 7857.3352   | 181.6674    | 0.6667     | 97.7421  | 97.5381    |
| 4        | 32.613      | 32.0477     | 0.5925      | 0.7600     | 0.3987   | 0.3182     |
| -        | Total       | 8038.8473   | 186.2527    |            |          |            |

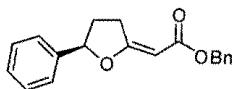

Mobile Phase: Hexane: IPA, 95:5

Flow rate : 0.5 mL/min

$\lambda$  : 254 nm

Tue, 8th Feb, 2011 17:05:04

RSFUR955

Page 1

Sample ID :  
 Amount : 20  
 Raw Data : rsfur955  
 Primary : rsfur955  
 Project : work1

Analyst : balu  
 Dilution : 1  
 From : Tue, 14th Jan, 2003 19:16:13  
 Calibration : (none)  
 Style : report

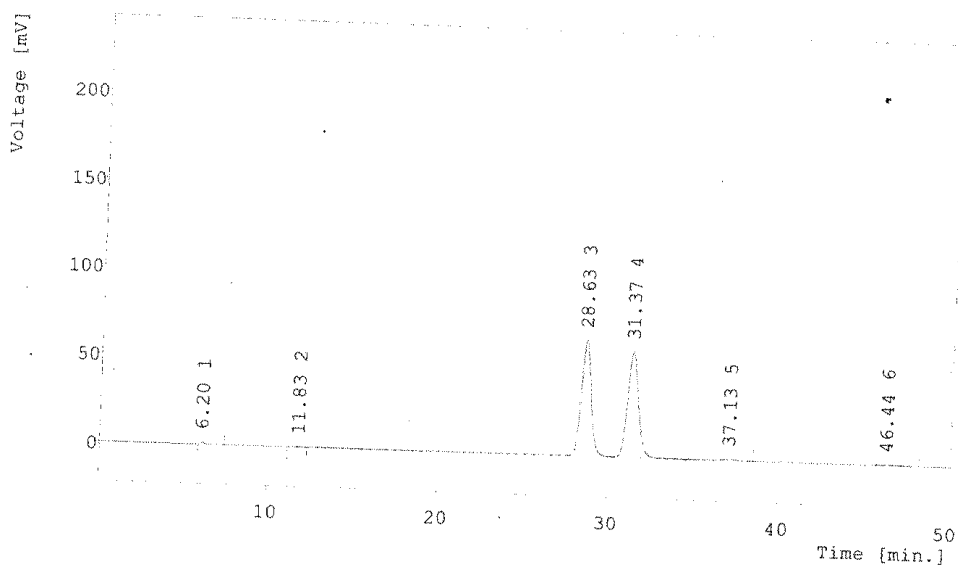

Result Table - Calculation Method Uncal

| Peak No. | Reten. time | Area [mV.s] | Height [mV] | W05 [min.] | Area [%] | Height [%] |
|----------|-------------|-------------|-------------|------------|----------|------------|
| 1        | 6.200       | 17.9286     | 1.0503      | 0.1867     | 0.3240   | 0.8239     |
| 2        | 11.827      | 14.9084     | 0.4012      | 0.6800     | 0.2694   | 0.3147     |
| 3        | 28.627      | 2770.1856   | 65.4191     | 0.6133     | 50.0571  | 51.3151    |
| 4        | 31.373      | 2650.6267   | 59.6036     | 0.6933     | 47.8966  | 46.7534    |
| 5        | 37.133      | 54.5712     | 0.6532      | 0.9600     | 0.9861   | 0.5124     |
| 6        | 46.440      | 25.8346     | 0.3576      | 1.1467     | 0.4668   | 0.2805     |
| -        | Total       | 5534.0550   | 127.4851    |            |          |            |

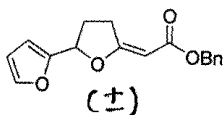

Mobile Phase: Hexane: IPA, 95:5

Flow rate : 0.5 mL/min

λ : 254 nm

Tue, 8th Feb, 2011 17:06:47

CHFUR955

Page 1

Sample ID :  
Amount : 20  
Raw Data : chfur955  
Primary : chfur955  
Project : work1

Analyst : balu  
Dilution : 1  
From : Tue, 14th Jan, 2003 21:59:29  
Calibration : (none)  
Style : report

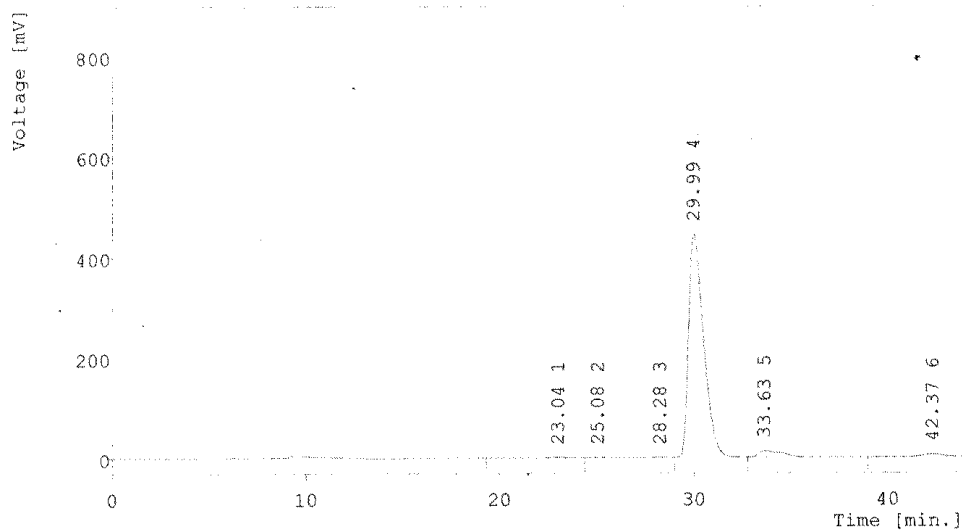

Result Table - Calculation Method Uncal

| Peak No. | Reten. time | Area [mV.s] | Height [mV] | W05 [min.] | Area [%] | Height [%] |
|----------|-------------|-------------|-------------|------------|----------|------------|
| 1        | 23.040      | 73.0377     | 0.9974      | 0.8800     | 0.2884   | 0.2141     |
| 2        | 25.080      | 38.5501     | 0.6578      | 0.6133     | 0.1522   | 0.1412     |
| 3        | 28.280      | 17.3147     | 0.3092      | 0.8933     | 0.0684   | 0.0664     |
| 4        | 29.987      | 23794.9224  | 445.8460    | 0.8400     | 93.9675  | 95.7190    |
| 5        | 33.627      | 1026.1865   | 12.6693     | 1.4533     | 4.0525   | 2.7200     |
| 6        | 42.373      | 372.4821    | 5.3063      | 1.0667     | 1.4710   | 1.1393     |
| -        | Total       | 25322.4934  | 465.7861    |            |          |            |

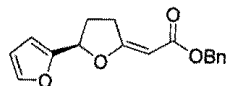

Mobile Phase: Hexane: IPA, 95:5

Flow rate : 0.5 mL/min

$\lambda$  : 254 nm
